# Supplementary material
Source: MDPI journal article supplement (https://www.mdpi.com/2077-1312/9/4/430)

**Figure S1.** Phylogenetic tree of endophyte fungi

1-A) Phylogenetic tree of endophyte fungi in host species *Phragmites australis* in site 1

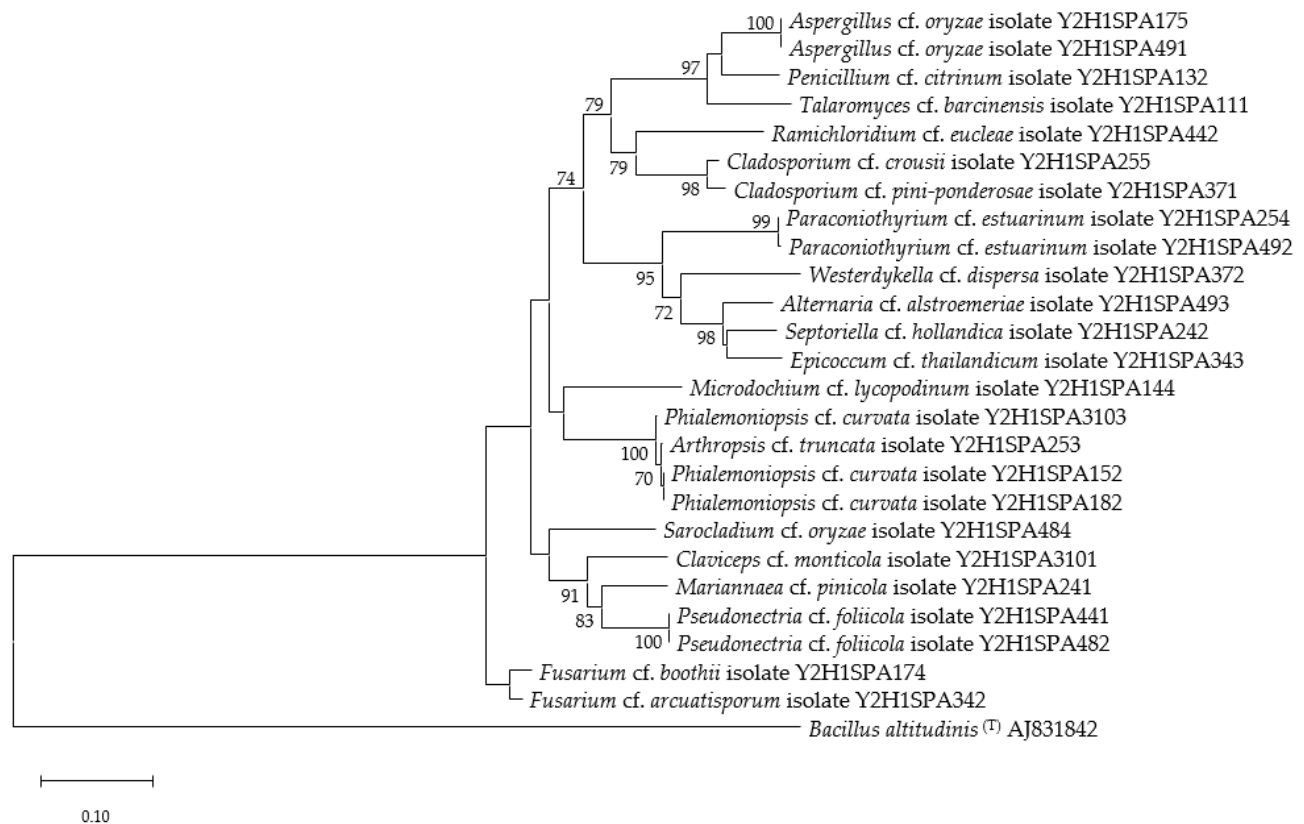

1-B) Phylogenic tree of endophyte fungi in host species *Phragmites australis* in site 2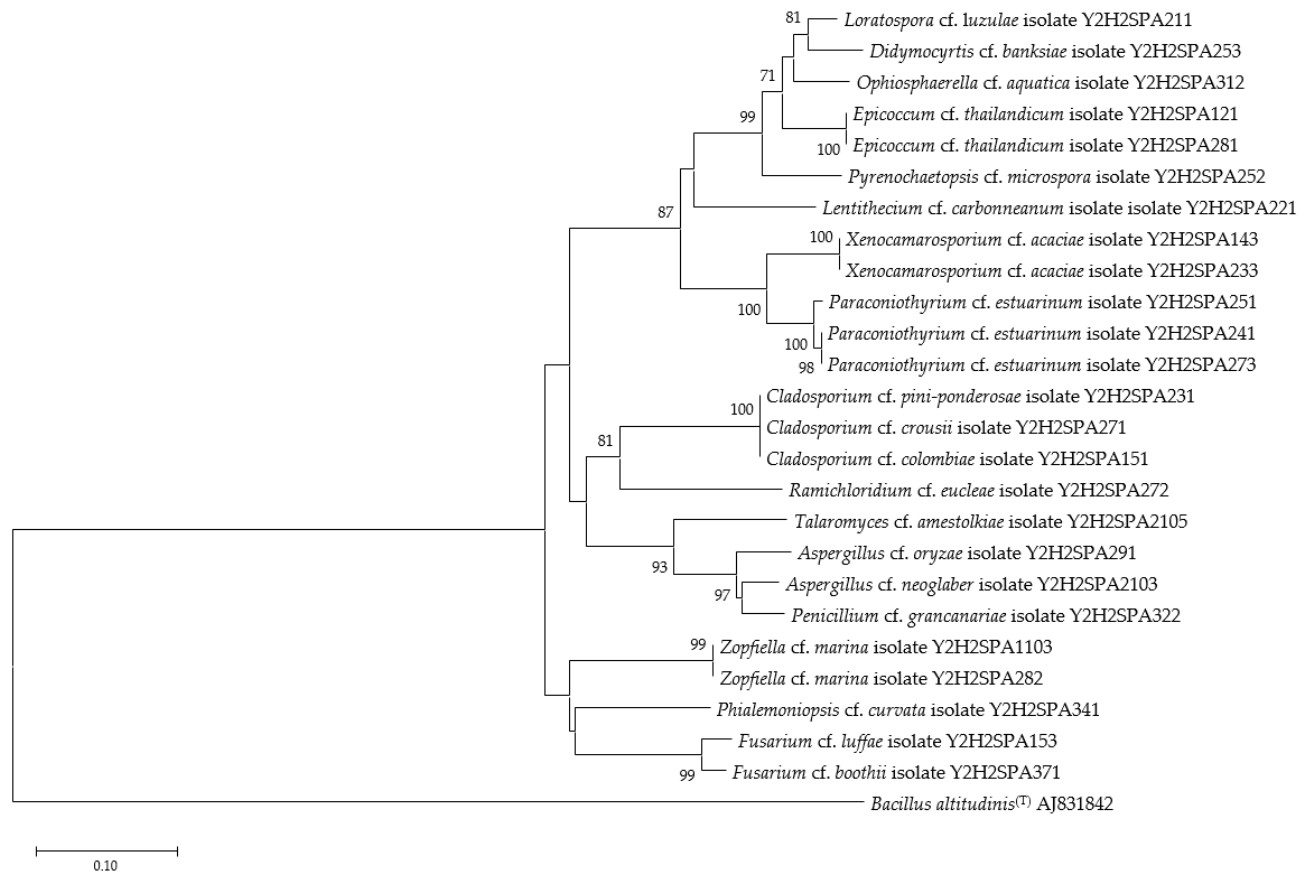

1-C) Phylogenetic tree of endophyte fungi in host species *Phragmites australis* in site 3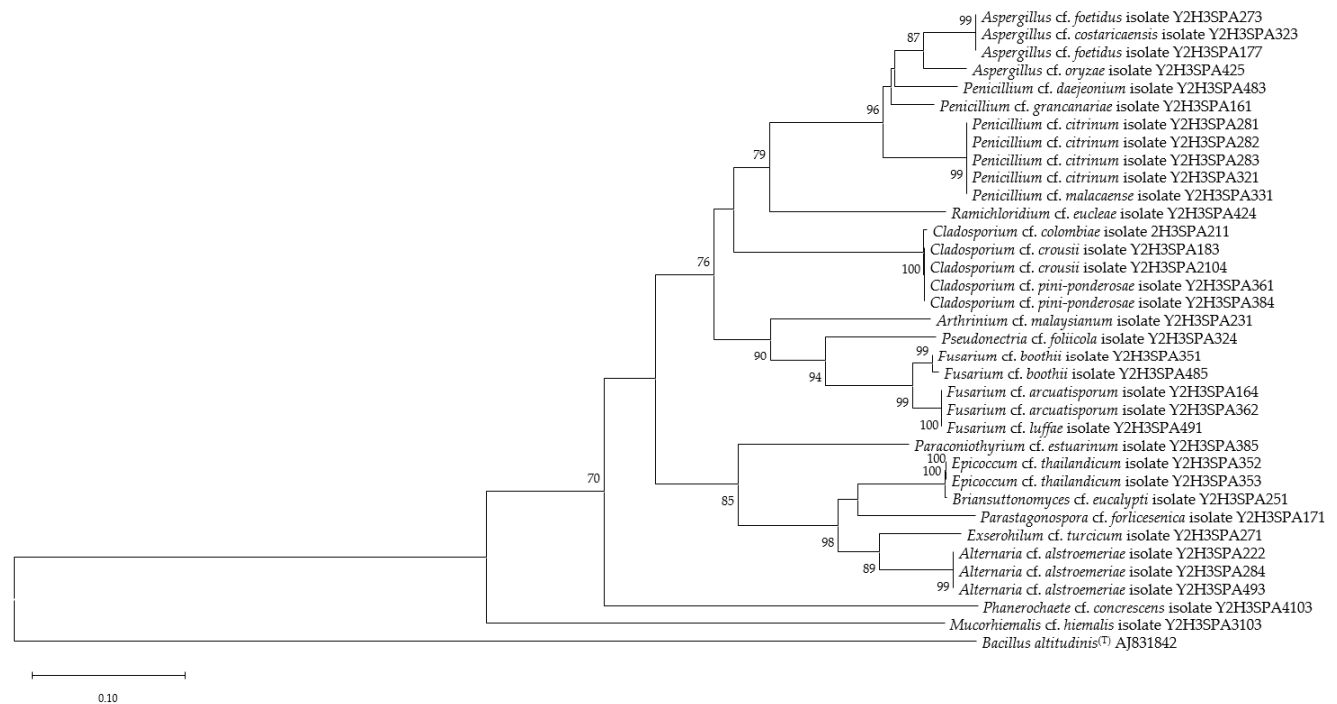

1-D) Phylogenic tree of endophyte fungi in host species *Phragmites australis* in site 4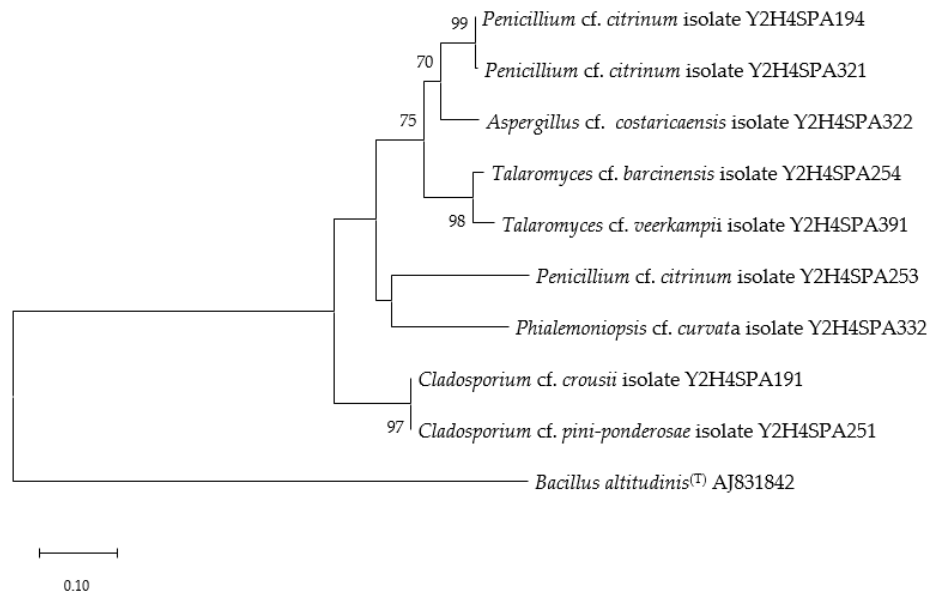

1-E) Phylogenic tree of endophyte fungi in host species *Phragmites australis* in site 5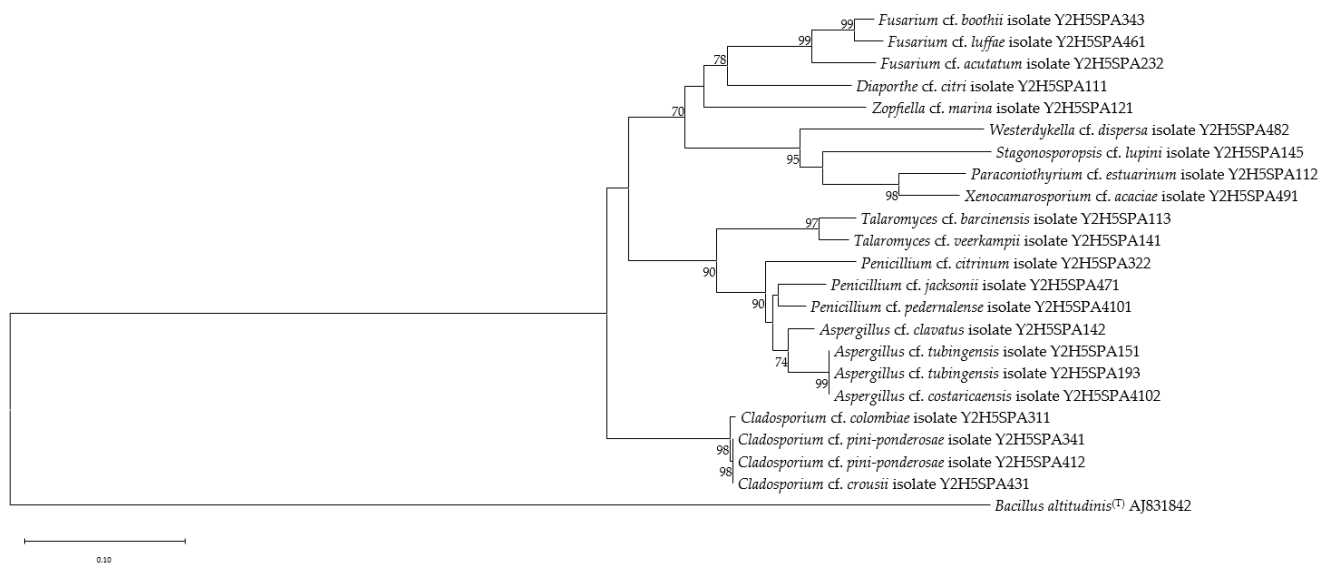

1-F) Phylogenic tree of endophyte fungi in host species *Phragmites australis* in site 6

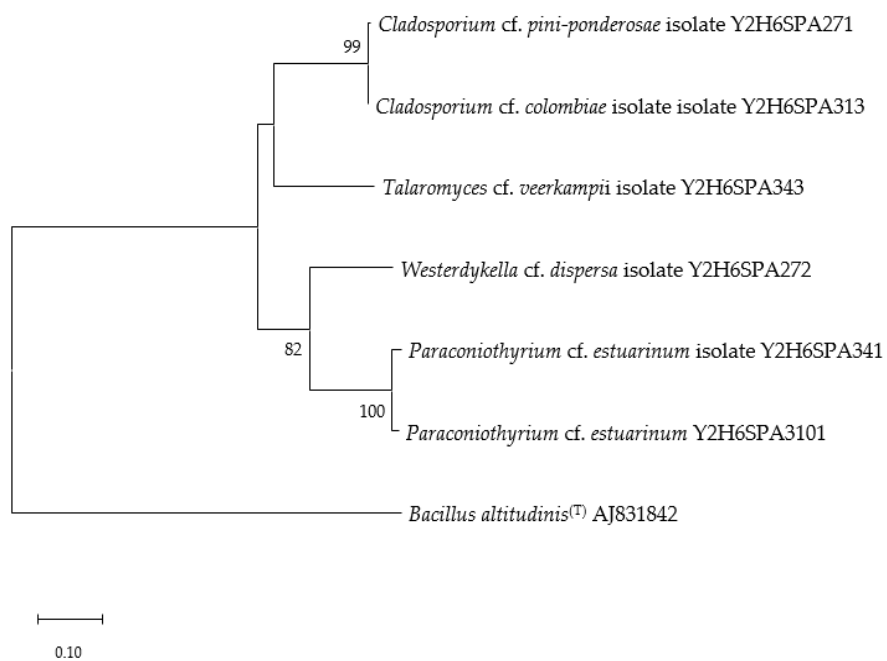

1-G) Phylogenic tree of endophyte fungi in host species *Phragmites australis* in site 7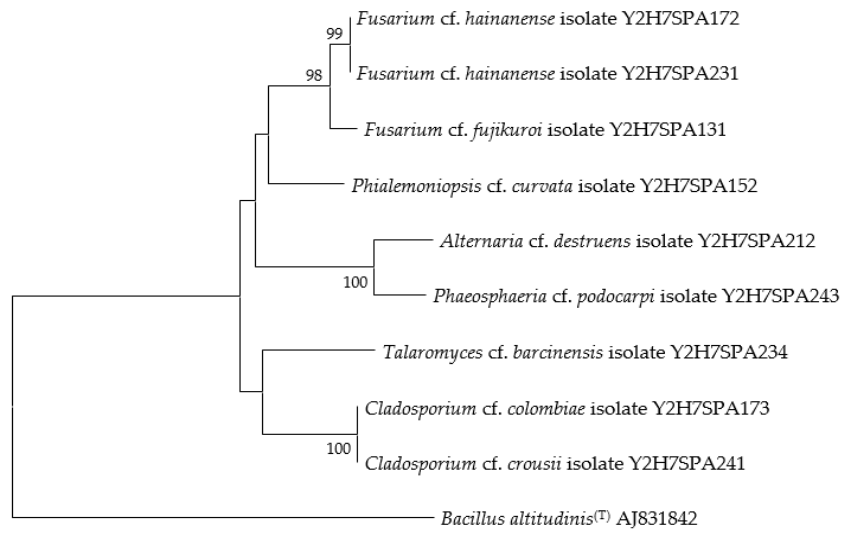

1-H) Phylogenic tree of endophyte fungi in host species *Phragmites australis* in site 8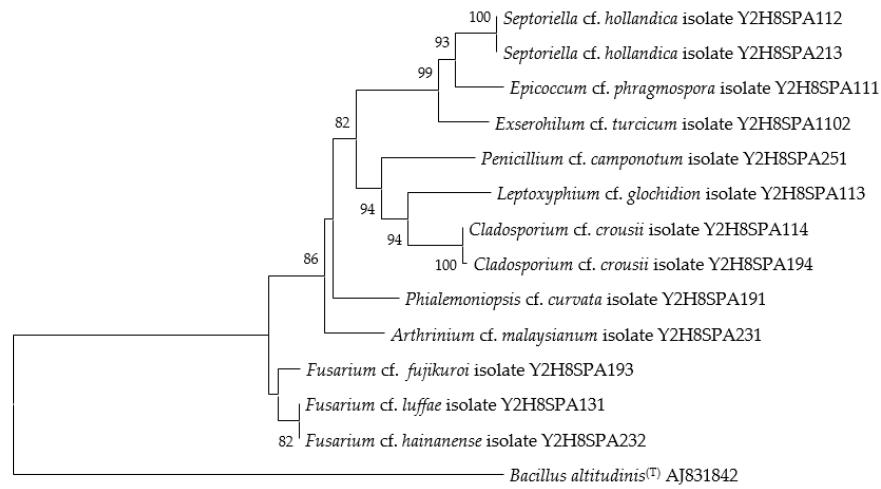



1-I) Phylogenic tree of endophyte fungi in host species *Phragmites australis* in site 9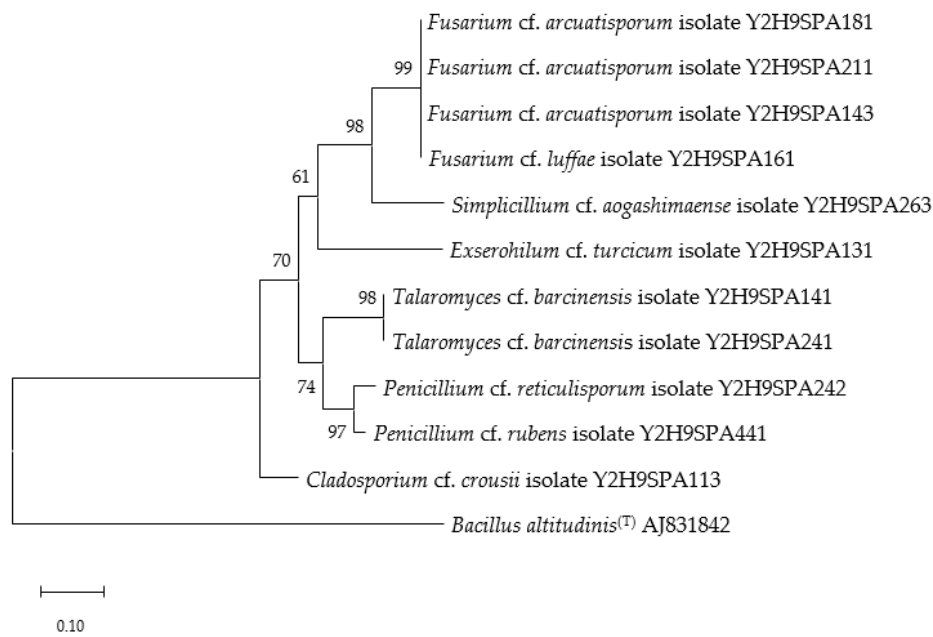

1-J) Phylogenic tree of endophyte fungi in host species *Phragmites australis* in site 10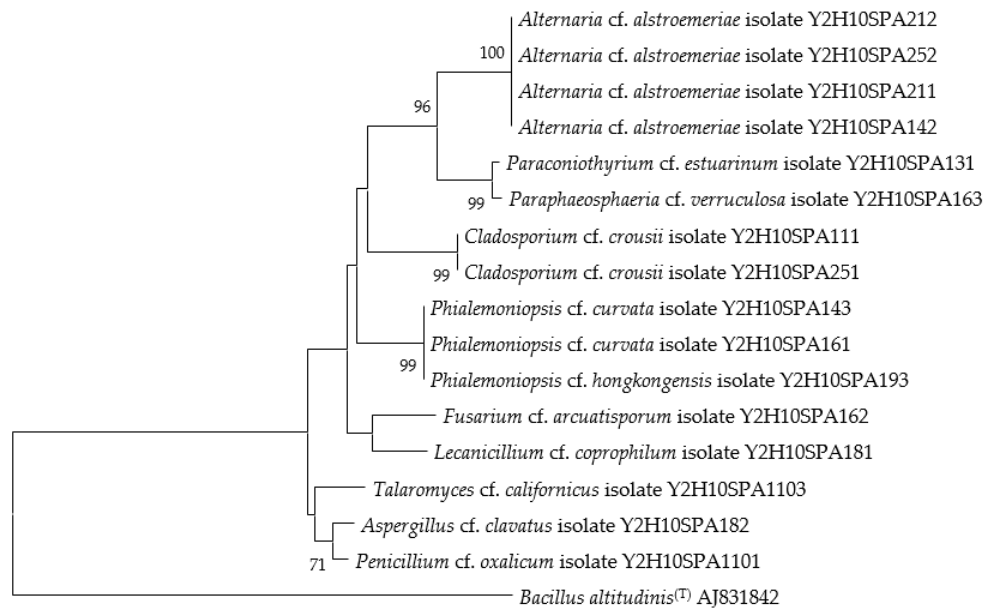

1-K) Phylogenic tree of endophyte fungi in host species *Phragmites australis* in site 11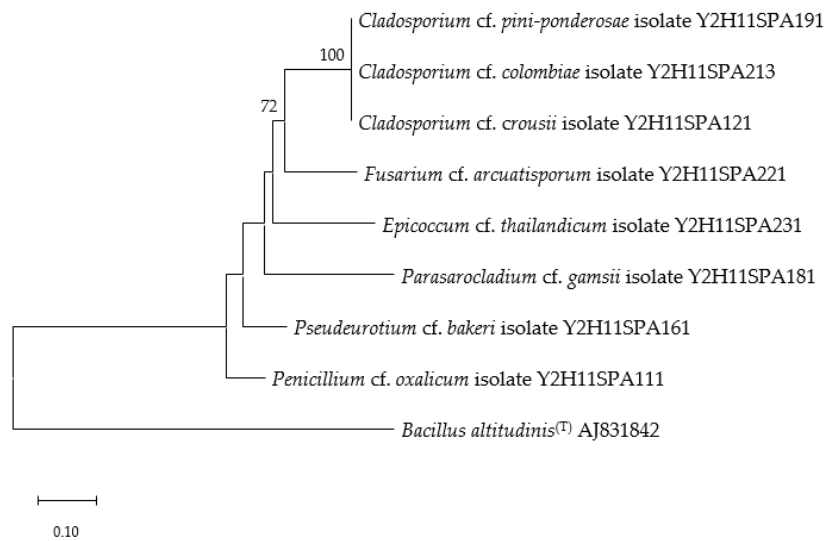

1-L) Phylogenetic tree of endophyte fungi in host species *Suaeda japonica* in site 1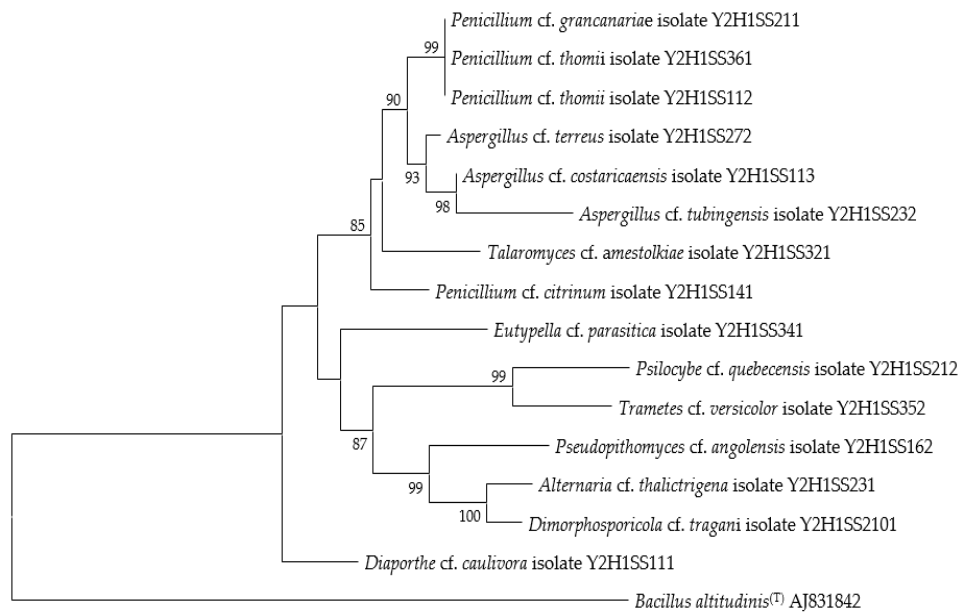

1-M) Phylogenic tree of endophyte fungi in host species *Suaeda japonica* in site 2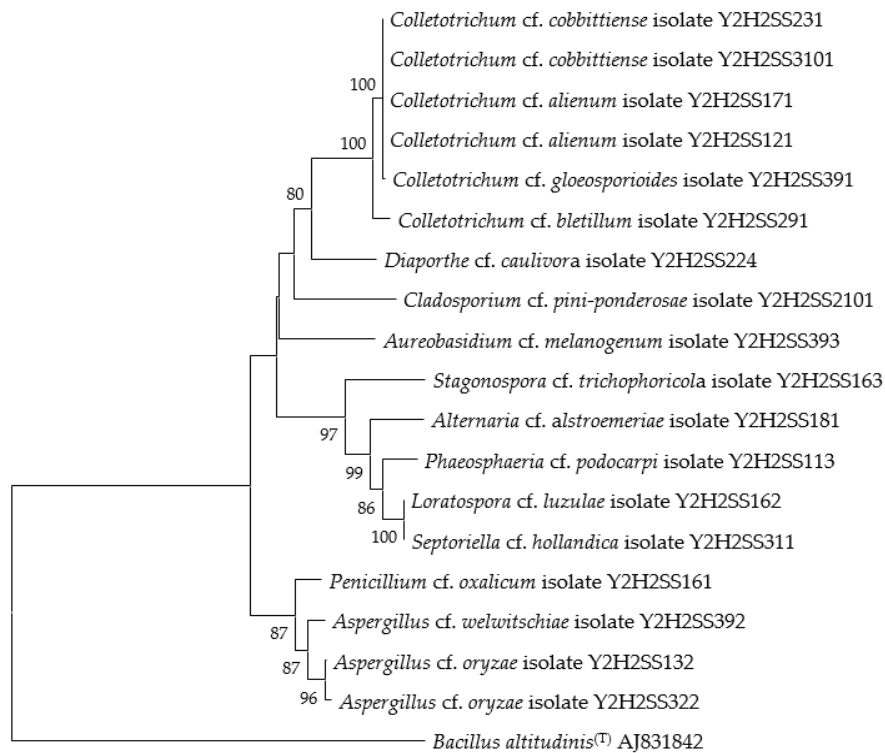

0.10

1-N) Phylogenic tree of endophyte fungi in host species *Suaeda japonica* in site 3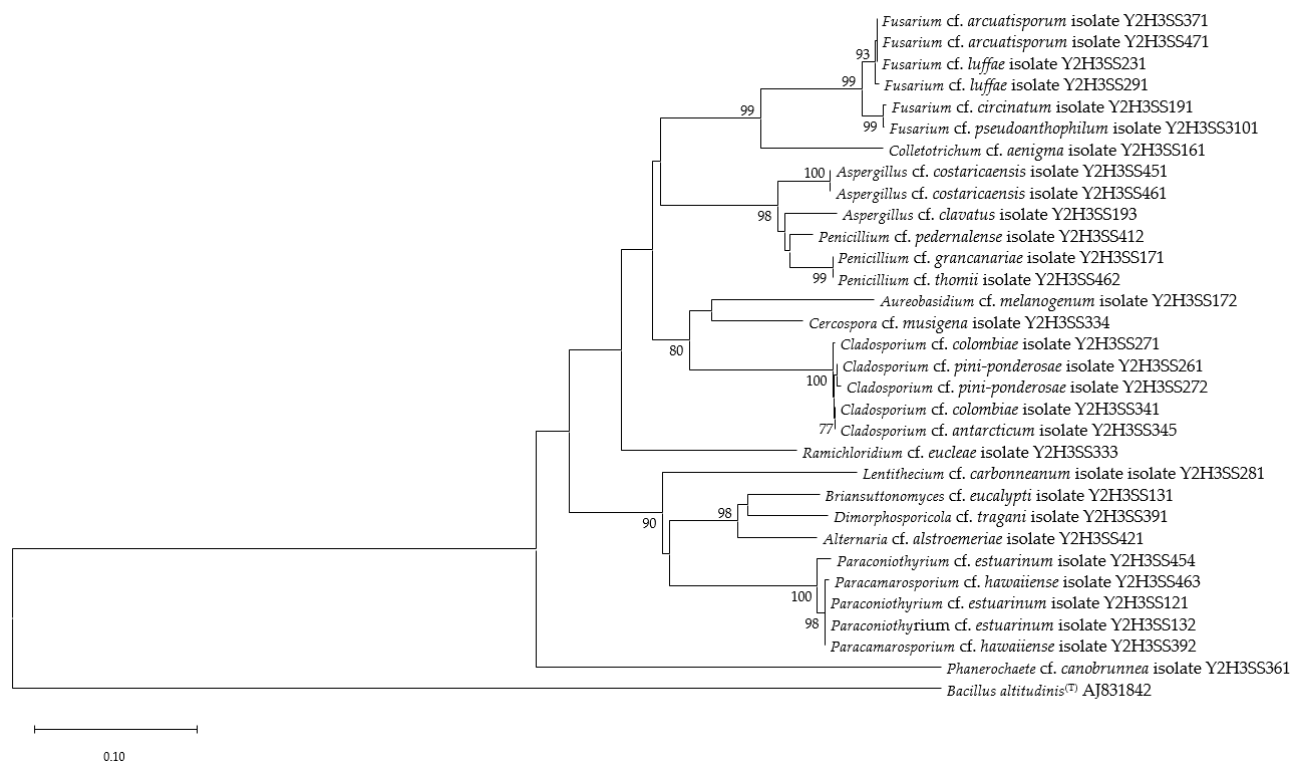

1-O) Phylogenic tree of endophyte fungi in host species *Suaeda japonica* in site 4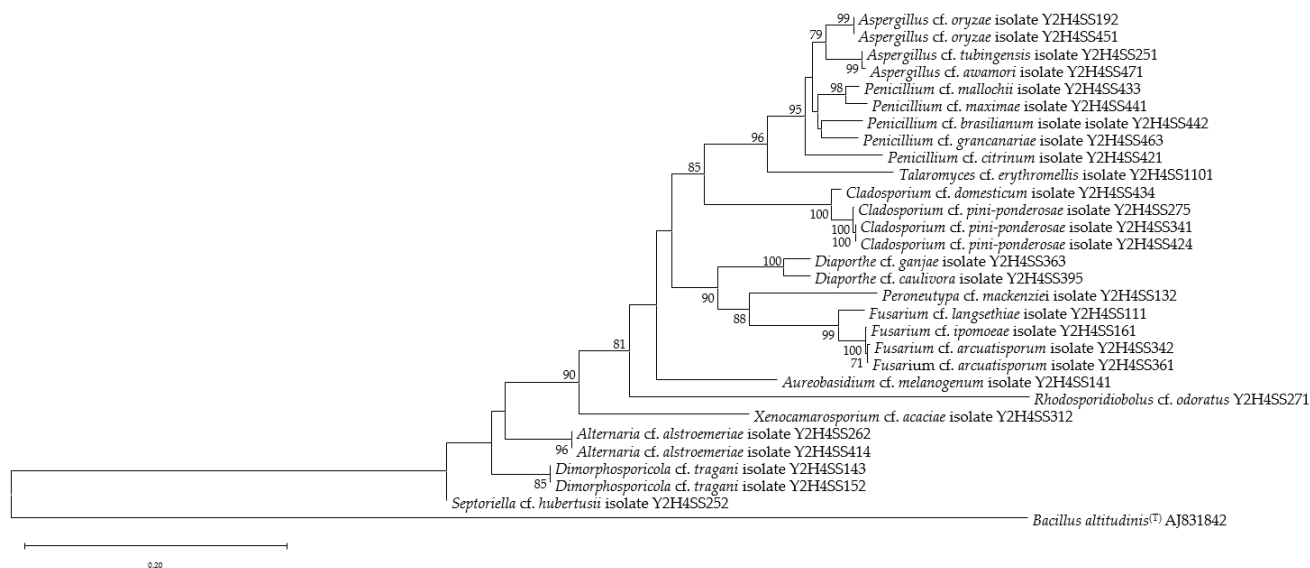

1-P) Phylogenic tree of endophyte fungi in host species *Suaeda japonica* in site 5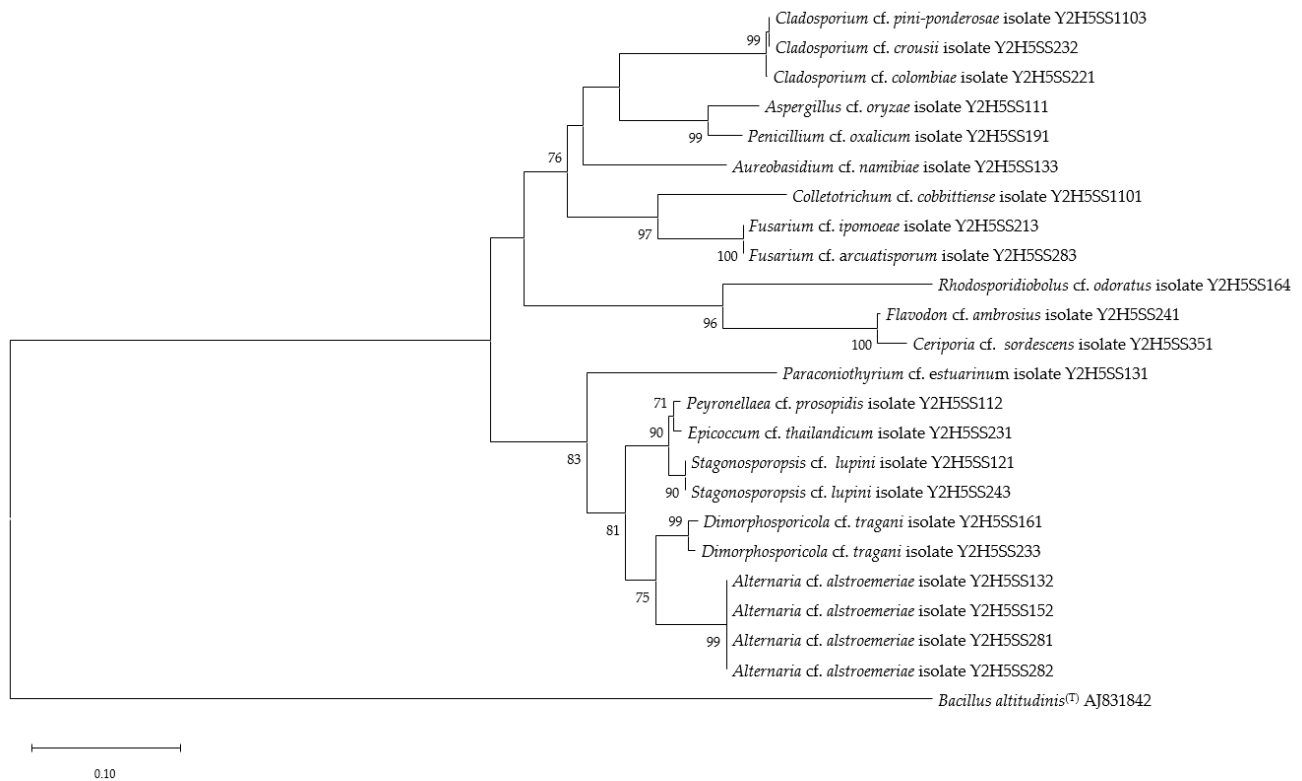



1-Q) Phylogenic tree of endophyte fungi in host species *Suaeda japonica* in site 6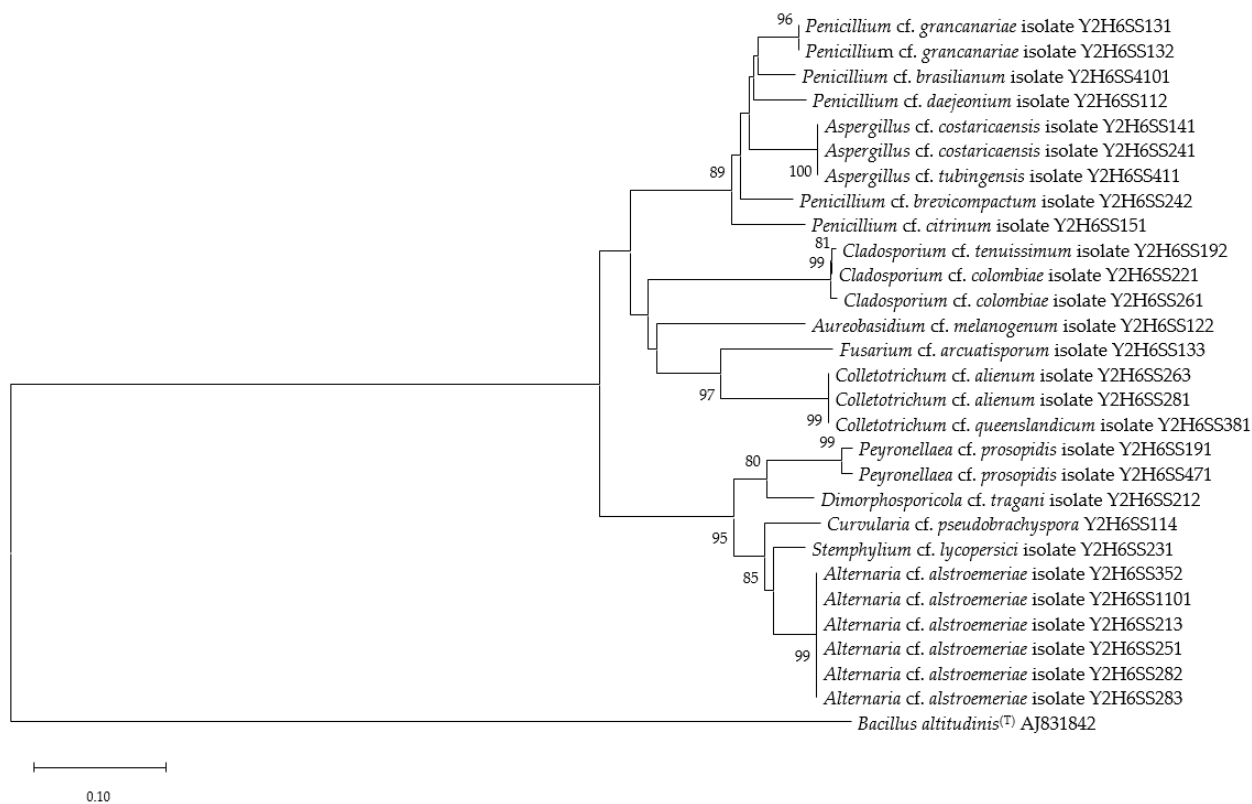

Supplement: s1 [file s1]
