# Supplementary material
Source: MDPI journal article supplement (https://www.mdpi.com/2077-1312/9/4/430)

**Figure S2.** Distribution of fungal endophyte symbiosis with each halophyte species and colony

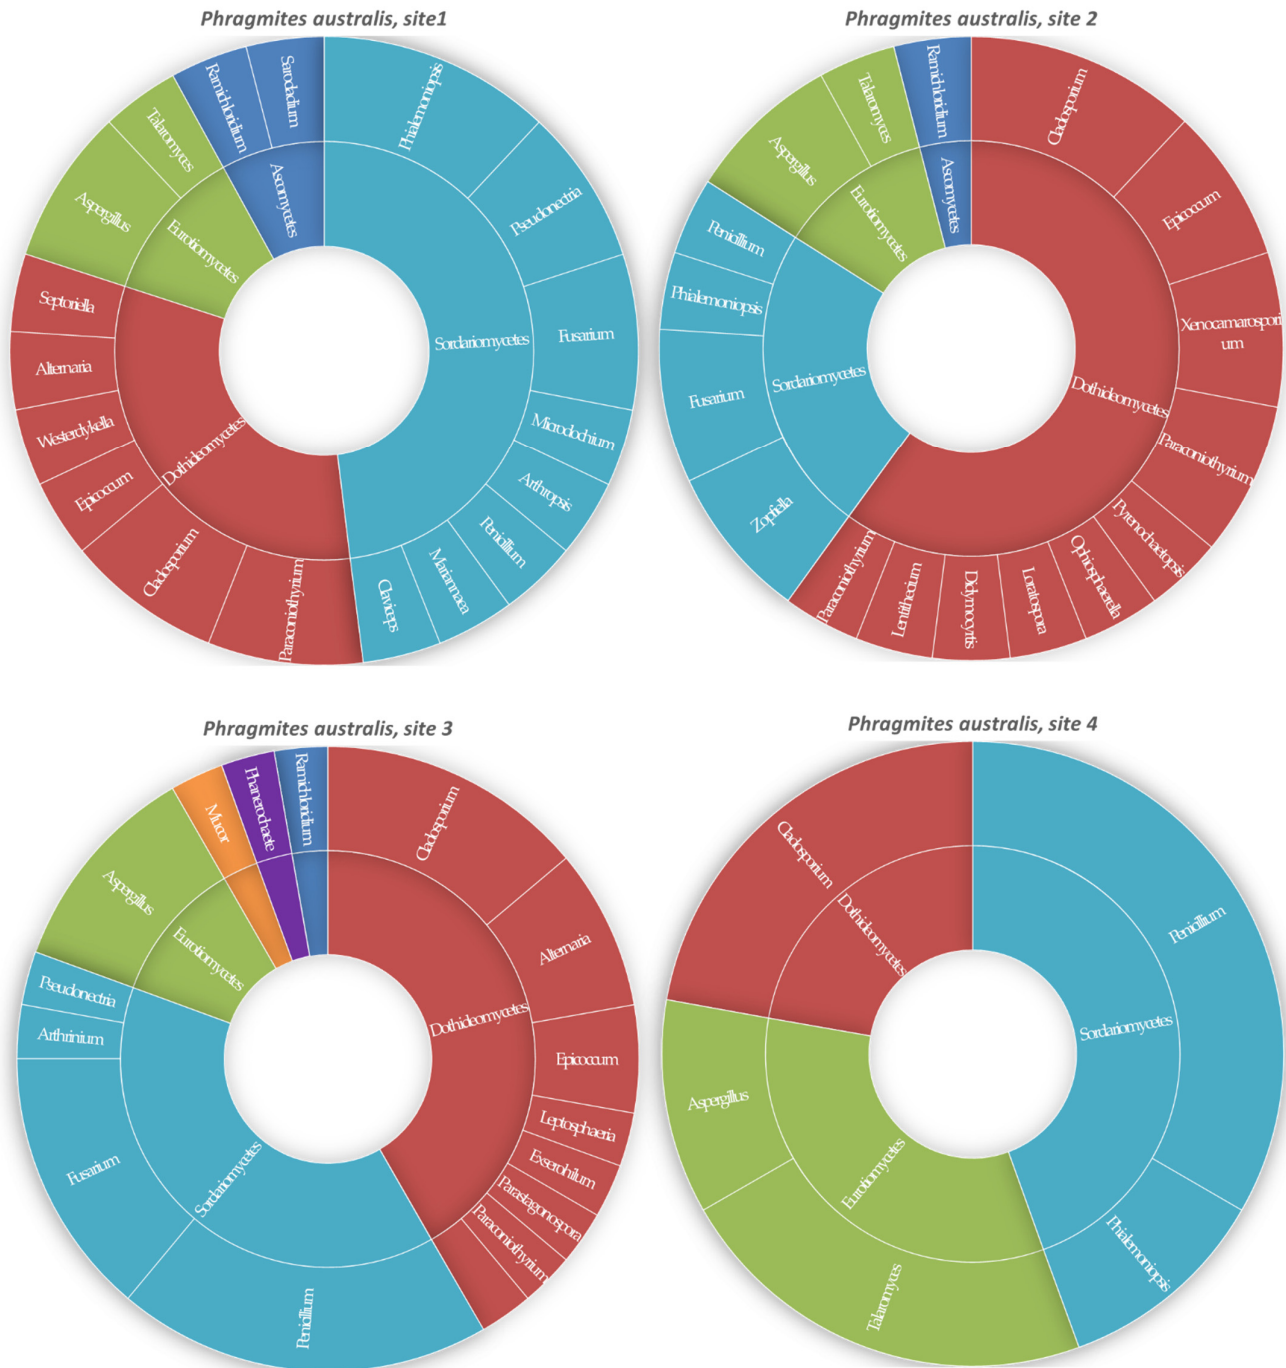

*Phragmites australis*, site 5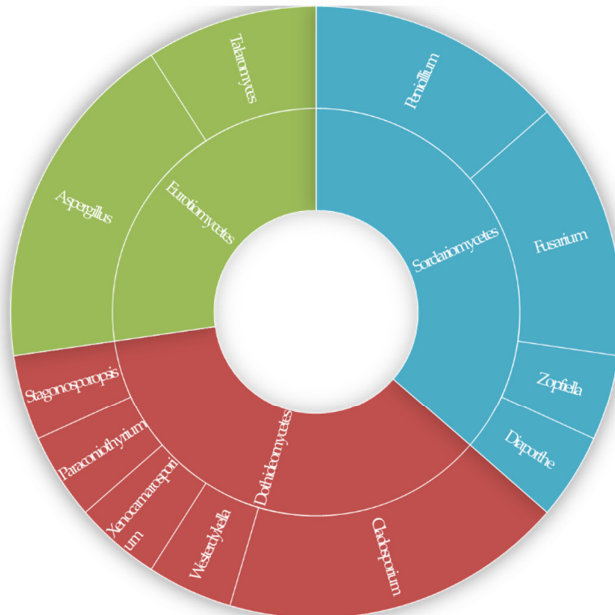*Phragmites australis*, site 6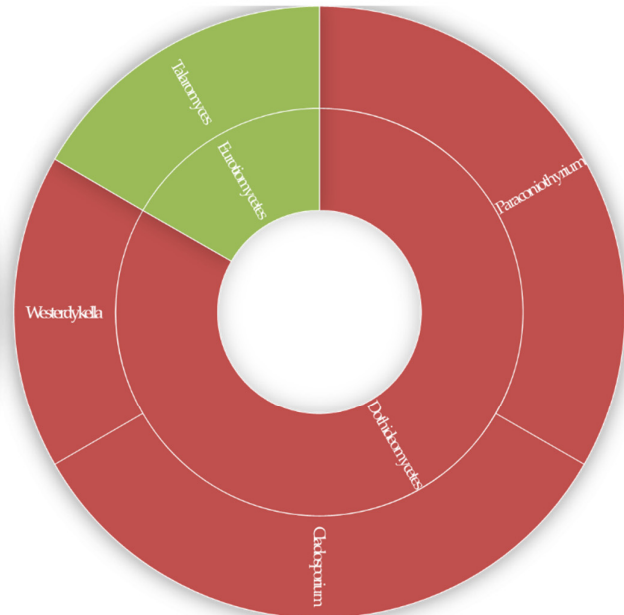*Phragmites australis*, site 7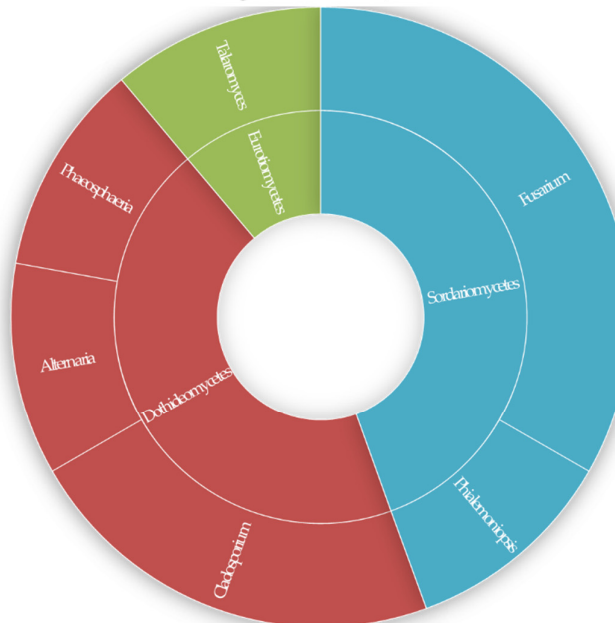*Phragmites australis*, site 8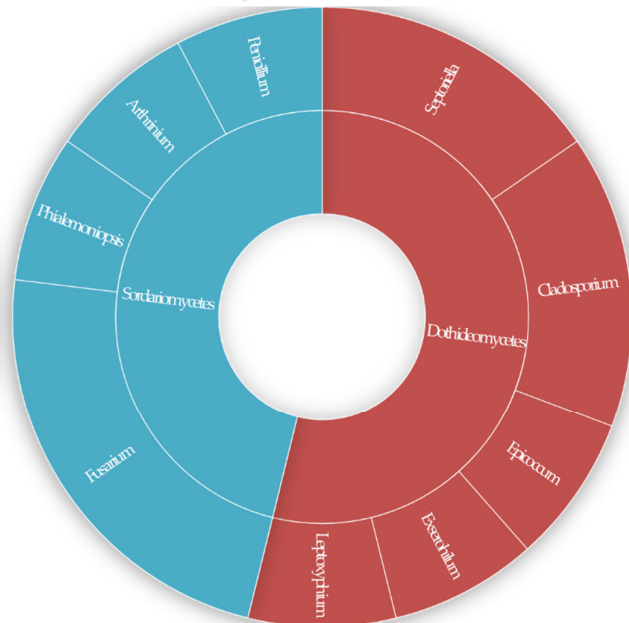

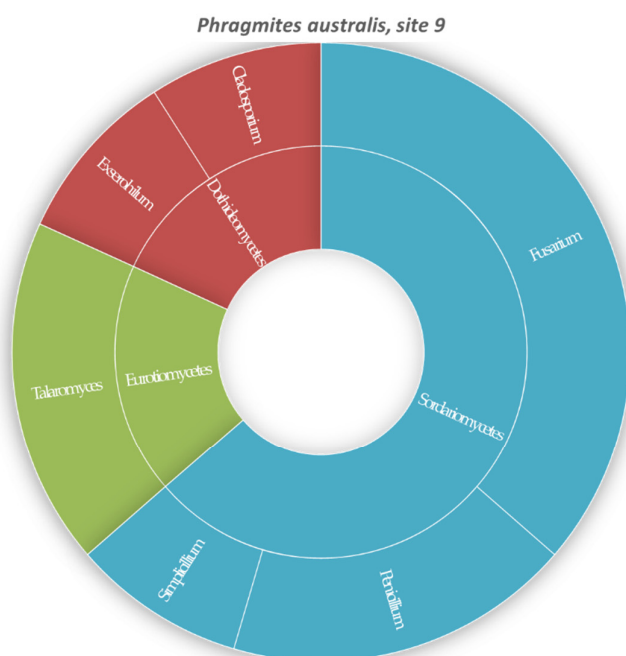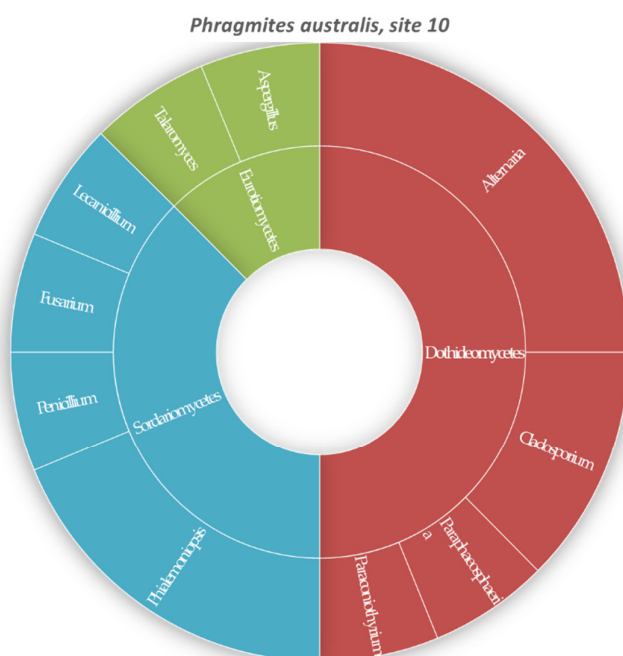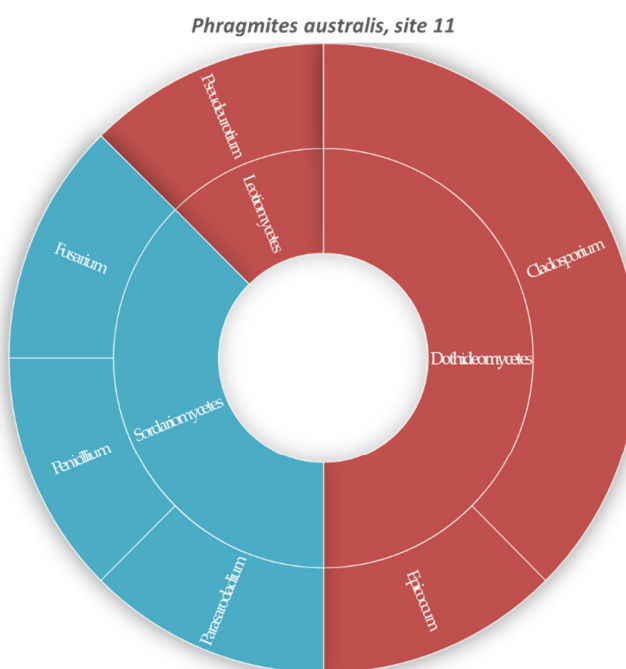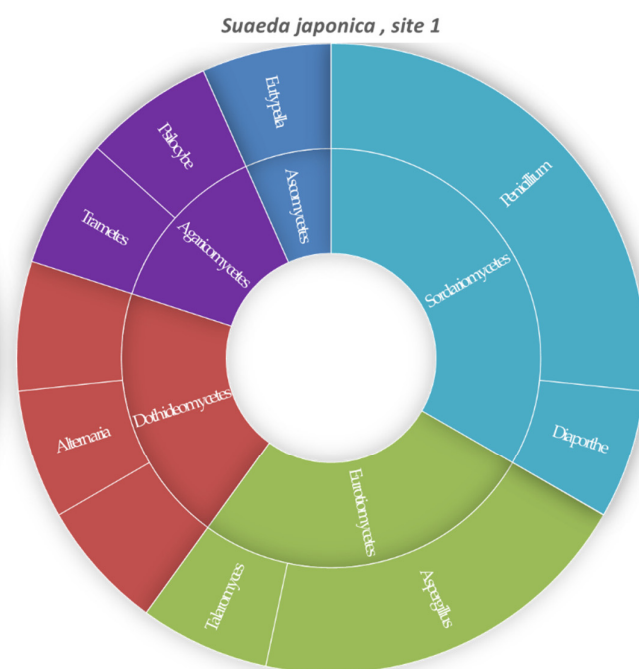

*Suaeda japonica*, site 2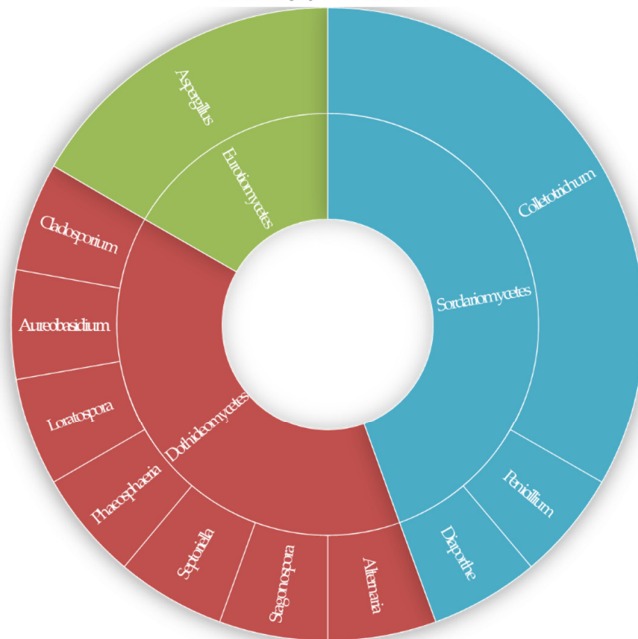*Suaeda japonica*, site 3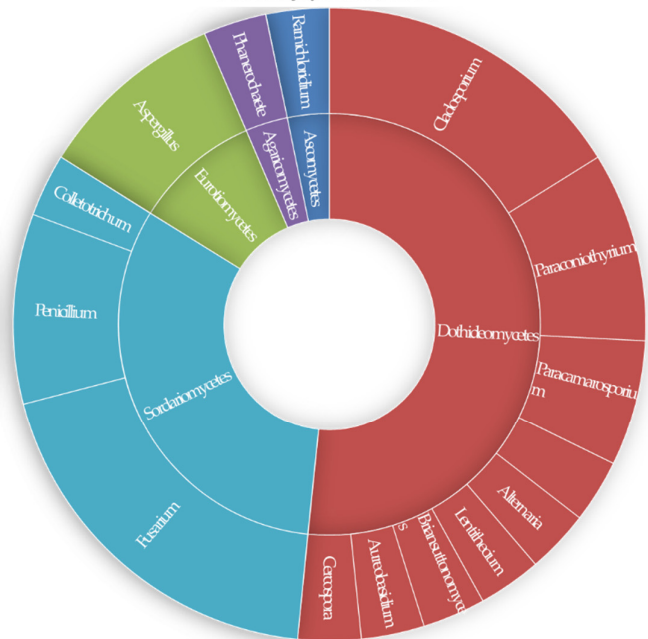*Suaeda japonica*, site 4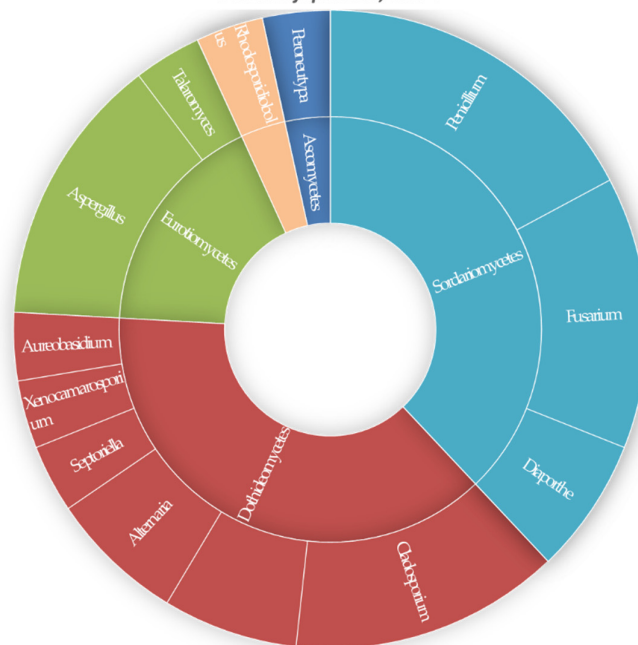*Suaeda japonica*, site 5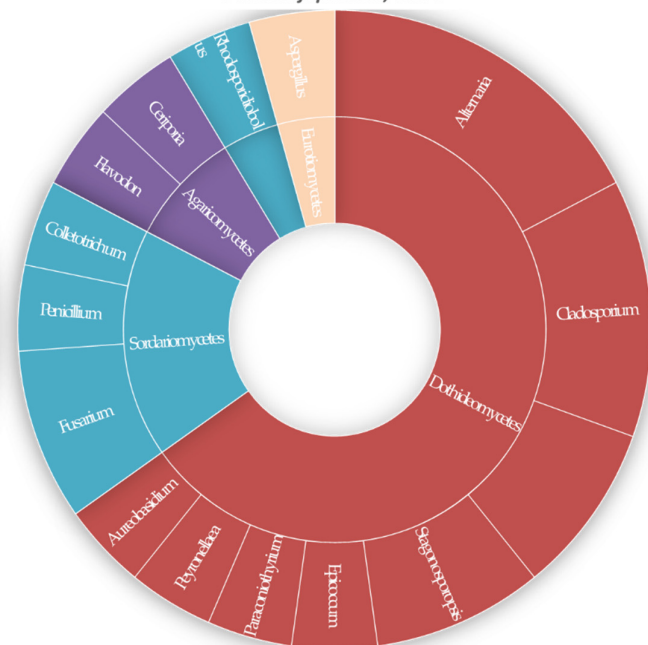

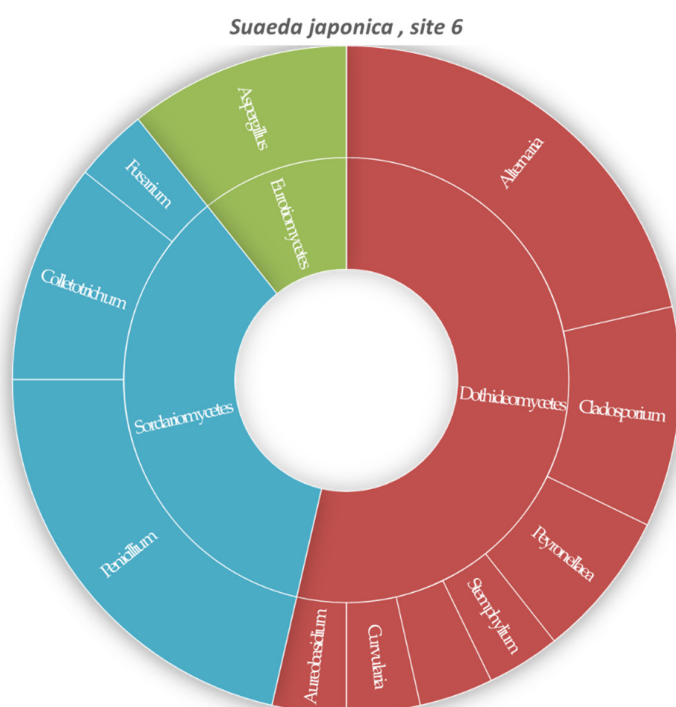

Supplement: s1 [file s1]
