# Supplementary material
Source: MDPI journal article supplement (https://www.mdpi.com/2077-1312/9/4/430)
Supplement: s1 [file s1]

Table S2. Fungal endophyte isolates from host *Sueda japonica* species clusters (continued)

| Sites | Isolates   | Closest relative based on homology                | Similarity (%) | Genbank accession no. | Division      | Class           | Order        | Family             | Genus                    |
|-------|------------|---------------------------------------------------|----------------|-----------------------|---------------|-----------------|--------------|--------------------|--------------------------|
| 1     | Y2H1SS341  | <i>Eutypella parasitica</i> (T) (NR165995)        | 98             | JX040839              | Ascomycota    | Ascomycetes     | Xylariales   | Diatrypaceae       | <i>Eutypella</i>         |
|       | Y2H1SS162  | <i>Pseudopithomyces angolensis</i> (T) (NR161121) | 99             | JX040831              |               | Dothideomycetes | Pleosporales | Didymosphaeriaceae | <i>Pseudopithomyces</i>  |
|       | Y2H1SS231  | <i>Alternaria thalictrigena</i> (T) (NR135937)    | 100            | JX040834              |               |                 |              | Pleosporaceae      | <i>Alternaria</i>        |
|       | Y2H1SS2101 | <i>Dimorphosporicola tragani</i> (T) (NR154007)   | 99             | JX040837              |               |                 |              |                    | <i>Dimorphosporicola</i> |
|       | Y2H1SS113  | <i>Aspergillus costaricensis</i> (T) (NR103604)   | 99             | JX040829              |               | Eurotiomycetes  | Eurotiales   | Trichocomaceae     | <i>Aspergillus</i>       |
|       | Y2H1SS272  | <i>Aspergillus terreus</i> (T) (NR131276)         | 100            | JX040836              |               |                 |              |                    | <i>Talaromyces</i>       |
|       | Y2H1SS232  | <i>Aspergillus tubingensis</i> (T) (NR131293)     | 91             | JX040835              |               |                 |              |                    |                          |
|       | Y2H1SS321  | <i>Talaromyces amestolkiae</i> (T) (NR120179)     | 99             | JX040838              |               |                 |              | Diaporthales       | <i>Diaporthe</i>         |
|       | Y2H1SS111  | <i>Diaporthe caulivora</i> (T) (NR111845)         | 99             | JX040827              |               |                 |              |                    |                          |
|       | Y2H1SS141  | <i>Penicillium citrinum</i> (T) (NR121224)        | 89             | JX040830              |               | Sordariomycetes | Hypocreales  | Nectriaceae        | <i>Penicillium</i>       |
|       | Y2H1SS211  | <i>Penicillium grancanariae</i> (T) (NR138348)    | 99             | JX040832              |               |                 |              |                    |                          |
|       | Y2H1SS361  | <i>Penicillium thomii</i> (T) (NR077159)          | 99             | JX040841              |               |                 |              |                    |                          |
|       | Y2H1SS112  | <i>Penicillium thomii</i> (T) (NR077159)          | 99             | JX040828              |               |                 |              |                    |                          |
|       | Y2H1SS212  | <i>Psilocybe quebecensis</i> (T) (NR160108)       | 85             | JX040833              | Basidiomycota | Agaricomycetes  | Agaricales   | Hymenogastraceae   | <i>Psilocybe</i>         |
|       | Y2H1SS352  | <i>Trametes versicolor</i> (T) (NR154494)         | 99             | JX040840              |               | Agaricomycetes  | Polyporales  | Polyporaceae       | <i>Trametes</i>          |

Table S2. Fungal endophyte isolates from host *Sueda japonica* species clusters (continued)

| Sites | Isolates   | Closest relative based on homology                   | Similarity (%) | Genbank accession no. | Division   | Class           | Order         | Family            | Genus                 |
|-------|------------|------------------------------------------------------|----------------|-----------------------|------------|-----------------|---------------|-------------------|-----------------------|
| 2     | Y2H2SS2101 | <i>Cladosporium pini-ponderosae</i> (T) (NR119730)   | 99             | JX040853              | Ascomycota | Dothideomycetes | Capnodiales   | Davidiellaceae    | <i>Cladosporium</i>   |
|       | Y2H2SS393  | <i>Aureobasidium melanogenum</i> (T) (NR159598)      | 93             | JX040858              |            |                 | Dothideales   | Dothioraceae      | <i>Aureobasidium</i>  |
|       | Y2H2SS162  | <i>Loratospora luzulae</i> (T) (NR154121)            | 100            | JX040846              |            |                 | Pleosporales  | Phaeosphaeriaceae | <i>Loratospora</i>    |
|       | Y2H2SS113  | <i>Phaeosphaeria podocarpi</i> (T) (NR137933)        | 99             | JX040842              |            |                 |               |                   | <i>Phaeosphaeria</i>  |
|       | Y2H2SS311  | <i>Septoriella hollandica</i> (T) (NR164461)         | 96             | JX040854              |            |                 |               |                   | <i>Septoriella</i>    |
|       | Y2H2SS163  | <i>Stagonospora trichophoricola</i> (T) (NR156586)   | 99             | JX040847              |            |                 |               |                   | <i>Stagonospora</i>   |
|       | Y2H2SS181  | <i>Alternaria alstroemeriae</i> (T) (NR163686)       | 99             | JX040849              |            |                 |               | Pleosporaceae     | <i>Alternaria</i>     |
|       | Y2H2SS132  | <i>Aspergillus oryzae</i> (T) (NR135395)             | 99             | JX040844              |            | Eurotiomycetes  | Eurotiales    | Trichocomaceae    | <i>Aspergillus</i>    |
|       | Y2H2SS322  | <i>Aspergillus oryzae</i> (T) (NR135395)             | 97             | JX040855              |            |                 |               |                   |                       |
|       | Y2H2SS392  | <i>Aspergillus welwitschiae</i> (T) (NR137513)       | 98             | JX040857              |            |                 | Diaporthales  | Diaporthaceae     | <i>Diaporthe</i>      |
|       | Y2H2SS224  | <i>Diaporthe caulivora</i> (T) (NR111845)            | 97             | JX040850              |            |                 |               |                   |                       |
|       | Y2H2SS121  | <i>Colletotrichum alienum</i> (T) (NR120141)         | 99             | JX040843              |            | Sordariomycetes | Glomerellales | Glomerellaceae    | <i>Colletotrichum</i> |
|       | Y2H2SS171  | <i>Colletotrichum alienum</i> (T) (NR120141)         | 97             | JX040848              |            |                 |               |                   |                       |
|       | Y2H2SS291  | <i>Colletotrichum bletillum</i> (T) (NR160994)       | 99             | JX040852              |            |                 |               |                   |                       |
|       | Y2H2SS3101 | <i>Colletotrichum cobbittense</i> (T) (NR163538)     | 99             | JX040859              |            |                 |               |                   |                       |
|       | Y2H2SS231  | <i>Colletotrichum cobbittense</i> (T) (NR163538)     | 99             | JX040851              |            |                 |               |                   |                       |
|       | Y2H2SS391  | <i>Colletotrichum gloeosporioides</i> (T) (NR160754) | 96             | JX040856              |            |                 |               |                   |                       |
|       | Y2H2SS161  | <i>Penicillium oxalicum</i> (T) (NR121232)           | 99             | JX040845              |            |                 | Hypocreales   | Nectriaceae       | <i>Penicillium</i>    |

Table S2. Fungal endophyte isolates from host *Sueda japonica* species clusters (continued)

| Sites | Isolates   | Closest relative based on homology                 | Similarity (%) | Genbank accession no. | Division      | Class           | Order             | Family             | Genus                    |
|-------|------------|----------------------------------------------------|----------------|-----------------------|---------------|-----------------|-------------------|--------------------|--------------------------|
| 3     | Y2H3SS333  | <i>Ramichloridium eucleae</i> (T) (NR156590)       | 100            | JX040874              | Ascomycota    | Ascomycetes     | Mycosphaerellales | Dissoconiaceae     | <i>Ramichloridium</i>    |
|       | Y2H3SS345  | <i>Cladosporium antarcticum</i> (T) (NR121332)     | 99             | JX040877              |               | Dothideomycetes | Capnodiales       | Davidiellaceae     | <i>Cladosporium</i>      |
|       | Y2H3SS341  | <i>Cladosporium colombiae</i> (T) (NR119729)       | 97             | JX040876              |               |                 |                   |                    |                          |
|       | Y2H3SS271  | <i>Cladosporium colombiae</i> (T) (NR119729)       | 93             | JX040870              |               |                 |                   |                    |                          |
|       | Y2H3SS261  | <i>Cladosporium pini-ponderosae</i> (T) (NR119730) | 100            | JX040869              |               |                 |                   |                    |                          |
|       | Y2H3SS272  | <i>Cladosporium pini-ponderosae</i> (T) (NR119730) | 98             | JX040871              |               |                 |                   |                    |                          |
|       | Y2H3SS334  | <i>Cercospora musigena</i> (T) (NR147294)          | 98             | JX040875              |               |                 |                   | Mycosphaerellaceae | <i>Cercospora</i>        |
|       | Y2H3SS172  | <i>Aureobasidium melanogenum</i> (T) (NR159598)    | 99             | JX040865              |               |                 | Dothideales       | Dothioraceae       | <i>Aureobasidium</i>     |
|       | Y2H3SS131  | <i>Briansuttonomyces eucalypti</i> (T) (NR153618)  | 98             | JX040861              |               |                 |                   | Didymellaceae      | <i>Briansuttonomyces</i> |
|       | Y2H3SS392  | <i>Paracamarosporium hawaiiense</i> (T) (NR154287) | 100            | JX040881              |               |                 | Pleosporales      | Didymosphaeriaceae | <i>Paracamarosporium</i> |
|       | Y2H3SS463  | <i>Paracamarosporium hawaiiense</i> (T) (NR154287) | 98             | JX040889              |               |                 |                   |                    |                          |
|       | Y2H3SS132  | <i>Paraconiothyrium estuarinum</i> (T) (NR166007)  | 98             | JX040862              |               |                 |                   |                    |                          |
|       | Y2H3SS121  | <i>Paraconiothyrium estuarinum</i> (T) (NR166007)  | 99             | JX040860              |               |                 |                   |                    |                          |
|       | Y2H3SS454  | <i>Paraconiothyrium estuarinum</i> (T) (NR166007)  | 99             | JX040886              |               |                 |                   |                    |                          |
|       | Y2H3SS281  | <i>Lentithecium carbonneanum</i> (T) (NR158534)    | 94             | JX040872              |               |                 |                   | Lentitheciaceae    | <i>Lentithecium</i>      |
|       | Y2H3SS421  | <i>Alternaria alstroemeriae</i> (T) (NR163686)     | 99             | JX040884              |               |                 |                   | Pleosporaceae      | <i>Alternaria</i>        |
|       | Y2H3SS391  | <i>Dimorphosporicola tragani</i> (T) (NR154007)    | 93             | JX040880              |               |                 |                   |                    | <i>Dimorphosporicola</i> |
|       | Y2H3SS193  | <i>Aspergillus clavatus</i> (T) (NR121482)         | 87             | JX040867              |               | Eurotiomycetes  | Eurotiales        | Trichocomaceae     | <i>Aspergillus</i>       |
|       | Y2H3SS451  | <i>Aspergillus costaricensis</i> (T) (NR103604)    | 100            | JX040885              |               |                 |                   |                    |                          |
|       | Y2H3SS461  | <i>Aspergillus costaricensis</i> (T) (NR103604)    | 99             | JX040887              |               | Sordariomycetes | Glomerellales     | Glomerellaceae     | <i>Colletotrichum</i>    |
|       | Y2H3SS161  | <i>Colletotrichum aenigma</i> (T) (NR120140)       | 97             | JX040863              |               |                 |                   |                    |                          |
|       | Y2H3SS371  | <i>Fusarium arcuatissporum</i> (T) (NR164593)      | 100            | JX040879              |               |                 | Hypocreales       | Nectriaceae        | <i>Fusarium</i>          |
|       | Y2H3SS471  | <i>Fusarium arcuatissporum</i> (T) (NR164593)      | 99             | JX040890              |               |                 |                   |                    |                          |
|       | Y2H3SS191  | <i>Fusarium circinatum</i> (T) (NR120263)          | 99             | JX040866              |               |                 |                   |                    |                          |
|       | Y2H3SS231  | <i>Fusarium luffae</i> (T) (NR164594)              | 99             | JX040868              |               |                 |                   |                    |                          |
|       | Y2H3SS291  | <i>Fusarium luffae</i> (T) (NR164594)              | 98             | JX040873              |               |                 |                   |                    |                          |
|       | Y2H3SS3101 | <i>Fusarium pseudoanthophilum</i> (T) (NR163682)   | 97             | JX040882              |               |                 |                   |                    |                          |
|       | Y2H3SS171  | <i>Penicillium grancanariae</i> (T) (NR138348)     | 99             | JX040864              |               |                 |                   |                    | <i>Penicillium</i>       |
|       | Y2H3SS412  | <i>Penicillium pedernalense</i> (T) (NR146250)     | 87             | JX040883              |               |                 |                   |                    |                          |
|       | Y2H3SS462  | <i>Penicillium thomii</i> (T) (NR077159)           | 100            | JX040888              |               |                 |                   |                    |                          |
|       | Y2H3SS361  | <i>Phanerochaete canobrunnea</i> (T) (NR160571)    | 97             | JX040878              | Basidiomycota | Agaricomycetes  | Polyporales       | Phanerochaetaceae  | Phanerochaete            |

Table S2. Fungal endophyte isolates from host *Sueda japonica* species clusters (continued)

| Sites | Isolates   | Closest relative based on homology                 | Similarity (%) | Genbank accession no. | Division   | Class           | Order              | Family             | Genus                    |                 |             |             |
|-------|------------|----------------------------------------------------|----------------|-----------------------|------------|-----------------|--------------------|--------------------|--------------------------|-----------------|-------------|-------------|
| 4     | Y2H4SS111  | <i>Fusarium langsethiae</i> (T) (NR121214)         | 100            | JX040891              | Ascomycota | Ascomycetes     | Xylariales         | Diatrypaceae       | <i>Peroneutypa</i>       |                 |             |             |
|       | Y2H4SS132  | <i>Peroneutypa mackenziei</i> (T) (NR154363)       | 99             | JX040892              |            | Dothideomycetes | Capnodiales        | Davidiellaceae     | <i>Cladosporium</i>      |                 |             |             |
|       | Y2H4SS141  | <i>Aureobasidium melanogenum</i> (T) (NR159598)    | 100            | JX040893              |            |                 |                    |                    |                          |                 |             |             |
|       | Y2H4SS143  | <i>Dimorphosporicola tragani</i> (T) (NR154007)    | 92             | JX040894              |            |                 |                    |                    |                          |                 |             |             |
|       | Y2H4SS152  | <i>Dimorphosporicola tragani</i> (T) (NR154007)    | 92             | JX040895              |            |                 |                    |                    |                          |                 |             |             |
|       | Y2H4SS161  | <i>Fusarium ipomoeae</i> (T) (NR164596)            | 98             | JX040896              |            |                 | Dothideales        | Dothioraceae       | <i>Aureobasidium</i>     |                 |             |             |
|       | Y2H4SS192  | <i>Aspergillus oryzae</i> (T) (NR135395)           | 98             | JX040897              |            |                 |                    | Didymosphaeriaceae | <i>Xenocamarosporium</i> |                 |             |             |
|       | Y2H4SS1101 | <i>Talaromyces erythromellis</i> (T) (NR121531)    | 99             | JX040898              |            |                 |                    | Phaeosphaeriaceae  | <i>Septoriella</i>       |                 |             |             |
|       | Y2H4SS251  | <i>Aspergillus tubingensis</i> (T) (NR131293)      | 99             | JX040899              |            |                 | Pleosporales       | Pleosporaceae      | <i>Alternaria</i>        |                 |             |             |
|       | Y2H4SS252  | <i>Septoriella hubertusii</i> (T) (NR155786)       | 97             | JX040900              |            |                 |                    |                    |                          |                 |             |             |
|       | Y2H4SS262  | <i>Alternaria alstroemeriae</i> (T) (NR163686)     | 100            | JX040901              |            |                 |                    |                    |                          |                 |             |             |
|       | Y2H4SS271  | <i>Rhodosporidiobolus odoratus</i> (T) (NR155731)  | 99             | JX040902              |            |                 |                    |                    |                          |                 |             |             |
|       | Y2H4SS275  | <i>Cladosporium pini-ponderosae</i> (T) (NR119730) | 99             | JX040903              |            | Eurotiomycetes  | Eurotiales         | Trichocomaceae     | <i>Aspergillus</i>       |                 |             |             |
|       | Y2H4SS312  | <i>Xenocamarosporium acaciae</i> (T) (NR137982)    | 85             | JX040904              |            |                 |                    |                    |                          |                 |             |             |
|       | Y2H4SS341  | <i>Cladosporium pini-ponderosae</i> (T) (NR119730) | 99             | JX040905              |            |                 |                    |                    |                          |                 |             |             |
|       | Y2H4SS342  | <i>Fusarium arcuatisporum</i> (T) (NR164593)       | 99             | JX040906              |            |                 |                    |                    |                          |                 |             |             |
|       | Y2H4SS361  | <i>Fusarium arcuatisporum</i> (T) (NR164593)       | 100            | JX040907              |            |                 |                    |                    |                          |                 |             |             |
|       | Y2H4SS363  | <i>Diaporthe ganjae</i> (T) (NR120259)             | 99             | JX040908              |            |                 |                    |                    |                          |                 |             |             |
|       | Y2H4SS395  | <i>Diaporthe caulivora</i> (T) (NR111845)          | 99             | JX040909              |            |                 |                    |                    |                          |                 |             |             |
|       | Y2H4SS414  | <i>Alternaria alstroemeriae</i> (T) (NR163686)     | 97             | JX040910              |            |                 |                    |                    |                          |                 |             |             |
|       | Y2H4SS421  | <i>Penicillium citrinum</i> (T) (NR121224)         | 100            | JX040911              |            |                 |                    |                    |                          |                 |             |             |
|       | Y2H4SS424  | <i>Cladosporium pini-ponderosae</i> (T) (NR119730) | 99             | JX040912              |            |                 |                    |                    |                          | Sordariomycetes | Hypocreales | Nectriaceae |
|       | Y2H4SS433  | <i>Penicillium mallochii</i> (T) (NR111674)        | 99             | JX040913              |            |                 |                    |                    |                          |                 |             |             |
|       | Y2H4SS434  | <i>Cladosporium domesticum</i> (T) (NR156348)      | 100            | JX040914              |            |                 |                    |                    |                          |                 |             |             |
|       | Y2H4SS441  | <i>Penicillium maximae</i> (T) (NR121343)          | 99             | JX040915              |            |                 |                    |                    |                          |                 |             |             |
|       | Y2H4SS442  | <i>Penicillium brasilianum</i> (T) (NR111499)      | 87             | JX040916              |            |                 |                    |                    |                          |                 |             |             |
|       | Y2H4SS451  | <i>Aspergillus oryzae</i> (T) (NR135395)           | 99             | JX040917              |            |                 |                    |                    |                          |                 |             |             |
|       | Y2H4SS463  | <i>Penicillium grancanariae</i> (T) (NR138348)     | 99             | JX040918              |            |                 |                    |                    |                          |                 |             |             |
|       | Y2H4SS471  | <i>Aspergillus awamori</i> (T) (NR077143)          | 99             | JX040919              |            | Basidiomycota   | Microbotryomycetes | Sporidiobolales    | Sporidiobolaceae         |                 |             |             |

Table S2. Fungal endophyte isolates from host *Sueda japonica* species clusters (continued)

| Sites | Isolates   | Closest relative based on homology                 | Similarity (%) | Genbank accession no. | Division      | Class              | Order           | Family             | Genus                      |
|-------|------------|----------------------------------------------------|----------------|-----------------------|---------------|--------------------|-----------------|--------------------|----------------------------|
| 5     | Y2H5SS221  | <i>Cladosporium colombiae</i> (T) (NR119729)       | 100            | JX040933              | Ascomycota    | Dothideomycetes    | Capnodiales     | Davidiellaceae     | <i>Cladosporium</i>        |
|       | Y2H5SS232  | <i>Cladosporium crousii</i> (T) (NR148192)         | 99             | JX040935              |               |                    |                 |                    |                            |
|       | Y2H5SS1103 | <i>Cladosporium pini-ponderosae</i> (T) (NR119730) | 99             | JX040931              |               |                    | Dothideales     | Dothioraceae       | <i>Aureobasidium</i>       |
|       | Y2H5SS133  | <i>Aureobasidium namibiae</i> (T) (NR147362)       | 96             | JX040925              |               |                    |                 |                    |                            |
|       | Y2H5SS112  | <i>Peyronellaea prosopidis</i> (T) (NR137836)      | 100            | JX040921              |               |                    |                 | Didymellaceae      | <i>Peyronellaea</i>        |
|       | Y2H5SS243  | <i>Stagonosporopsis lupin</i> (T) (NR160205)       | 97             | JX040938              |               |                    |                 |                    |                            |
|       | Y2H5SS121  | <i>Stagonosporopsis lupini</i> (T) (NR160205)      | 100            | JX040922              |               |                    |                 | Didymosphaeriaceae | <i>Stagonosporopsis</i>    |
|       | Y2H5SS131  | <i>Paraconiothyrium estuarinum</i> (T) (NR166007)  | 99             | JX040923              |               |                    |                 |                    |                            |
|       | Y2H5SS152  | <i>Alternaria alstroemeriae</i> (T) (NR163686)     | 100            | JX040926              |               |                    | Pleosporales    | Pleosporaceae      | <i>Alternaria</i>          |
|       | Y2H5SS132  | <i>Alternaria alstroemeriae</i> (T) (NR163686)     | 99             | JX040924              |               |                    |                 |                    |                            |
|       | Y2H5SS281  | <i>Alternaria alstroemeriae</i> (T) (NR163686)     | 99             | JX040939              |               |                    |                 | Didymellaceae      | <i>Epicoccum</i>           |
|       | Y2H5SS282  | <i>Alternaria alstroemeriae</i> (T) (NR163686)     | 99             | JX040940              |               |                    |                 |                    |                            |
|       | Y2H5SS161  | <i>Dimorphosporicola tragani</i> (T) (NR154007)    | 94             | JX040927              |               |                    |                 | Glomerellaceae     | <i>Colletotrichum</i>      |
|       | Y2H5SS233  | <i>Dimorphosporicola tragani</i> (T) (NR154007)    | 93             | JX040936              |               |                    |                 |                    |                            |
|       | Y2H5SS231  | <i>Epicoccum thailandicum</i> (T) (NR152926)       | 100            | JX040934              |               |                    | Eurotiomycetes  | Eurotiales         | Trichocomaceae             |
|       | Y2H5SS111  | <i>Aspergillus oryzae</i> (T) (NR135395)           | 99             | JX040920              |               |                    |                 |                    |                            |
|       | Y2H5SS1101 | <i>Colletotrichum cobbittense</i> (T) (NR163538)   | 99             | JX040930              |               |                    | Glomerellales   | Glomerellaceae     | <i>Fusarium</i>            |
|       | Y2H5SS283  | <i>Fusarium arcuatisporum</i> (T) (NR164593)       | 98             | JX040941              |               |                    |                 |                    |                            |
|       | Y2H5SS213  | <i>Fusarium ipomoeae</i> (T) (NR164596)            | 99             | JX040932              |               | Sordariomycetes    | Hypocreales     | Nectriaceae        | <i>Penicillium</i>         |
|       | Y2H5SS191  | <i>Penicillium oxalicum</i> (T) (NR121232)         | 89             | JX040929              |               |                    |                 |                    |                            |
|       | Y2H5SS351  | <i>Ceriporia sordescens</i> (T) (NR148119)         | 99             | JX040942              | Basidiomycota | Agaricomycetes     | Polyporales     | Irpicaceae         | <i>Ceriporia</i>           |
|       | Y2H5SS241  | <i>Flavodon ambrosius</i> (T) (NR154000)           | 100            | JX040937              |               |                    |                 |                    |                            |
|       | Y2H5SS164  | <i>Rhodosporeidiobolus odoratus</i> (T) (NR155731) | 100            | JX040928              |               | Microbotryomycetes | Sporidiobolales | Sporidiobolaceae   | <i>Rhodosporeidiobolus</i> |

Table S2. Fungal endophyte isolates from host *Sueda japonica* species clusters (continued)

| Sites | Isolates   | Closest relative based on homology                  | Similarity (%) | Genbank accession no. | Division   | Class           | Order         | Family              | Genus                    |                |                       |
|-------|------------|-----------------------------------------------------|----------------|-----------------------|------------|-----------------|---------------|---------------------|--------------------------|----------------|-----------------------|
| 6     | Y2H6SS221  | <i>Cladosporium colombiae</i> (T) (NR119729)        | 98             | JX040956              | Ascomycota | Dothideomycetes | Capnodiales   | Davidiellaceae      | <i>Cladosporium</i>      |                |                       |
|       | Y2H6SS261  | <i>Cladosporium colombiae</i> (T) (NR119729)        | 100            | JX040961              |            |                 |               |                     |                          |                |                       |
|       | Y2H6SS192  | <i>Cladosporium tenuissimum</i> (T) (NR119855)      | 98             | JX040952              |            |                 |               |                     |                          | Dothideales    | Dothioraceae          |
|       | Y2H6SS122  | <i>Aureobasidium melanogenum</i> (T) (NR159598)     | 100            | JX040945              |            |                 |               |                     |                          |                |                       |
|       | Y2H6SS191  | <i>Peyronellaea prosopidis</i> (T) (NR137836)       | 99             | JX040951              |            |                 | Didymellaceae | <i>Peyronellaea</i> |                          |                |                       |
|       | Y2H6SS471  | <i>Peyronellaea prosopidis</i> (T) (NR137836)       | 99             | JX040969              |            |                 |               |                     |                          |                |                       |
|       | Y2H6SS1101 | <i>Alternaria alstroemeriae</i> (T) (NR163686)      | 99             | JX040953              |            |                 |               |                     |                          |                |                       |
|       | Y2H6SS213  | <i>Alternaria alstroemeriae</i> (T) (NR163686)      | 99             | JX040955              |            |                 | Pleosporales  | Pleosporaceae       | <i>Alternaria</i>        |                |                       |
|       | Y2H6SS251  | <i>Alternaria alstroemeriae</i> (T) (NR163686)      | 100            | JX040960              |            |                 |               |                     |                          |                |                       |
|       | Y2H6SS282  | <i>Alternaria alstroemeriae</i> (T) (NR163686)      | 99             | JX040964              |            |                 |               |                     |                          |                |                       |
|       | Y2H6SS283  | <i>Alternaria alstroemeriae</i> (T) (NR163686)      | 100            | JX040965              |            |                 |               |                     | <i>Curvularia</i>        |                |                       |
|       | Y2H6SS352  | <i>Alternaria alstroemeriae</i> (T) (NR163686)      | 99             | JX040966              |            |                 |               |                     |                          |                |                       |
|       | Y2H6SS114  | <i>Curvularia pseudobrachyspora</i> (T) (NR164423)  | 99             | JX040944              |            |                 |               |                     |                          |                |                       |
|       | Y2H6SS212  | <i>Dimorphosporicola tragani</i> (T) (NR154007)     | 94             | JX040954              |            |                 |               |                     | <i>Dimorphosporicola</i> |                |                       |
|       | Y2H6SS231  | <i>Stemphylium lycopersici</i> (T) (NR155002)       | 96             | JX040957              |            |                 |               |                     |                          |                |                       |
|       | Y2H6SS141  | <i>Aspergillus costaricensis</i> (T) (NR103604)     | 99             | JX040949              |            |                 |               |                     |                          | Eurotiomycetes | Eurotiales            |
|       | Y2H6SS241  | <i>Aspergillus costaricensis</i> (T) (NR103604)     | 100            | JX040958              |            |                 |               |                     |                          |                |                       |
|       | Y2H6SS411  | <i>Aspergillus tubingensis</i> (T) (NR131293)       | 100            | JX040968              |            |                 |               |                     |                          |                |                       |
|       | Y2H6SS281  | <i>Colletotrichum alienum</i> (T) (NR120141)        | 100            | JX040963              |            |                 |               |                     | Glomerellales            | Glomerellaceae | <i>Colletotrichum</i> |
|       | Y2H6SS263  | <i>Colletotrichum alienum</i> (T) (NR120141)        | 100            | JX040962              |            |                 |               |                     |                          |                |                       |
|       | Y2H6SS381  | <i>Colletotrichum queenslandicum</i> (T) (NR144796) | 100            | JX040967              |            |                 |               |                     |                          |                |                       |
|       | Y2H6SS133  | <i>Fusarium arcuatisporum</i> (T) (NR164593)        | 99             | JX040948              |            |                 |               |                     |                          |                | <i>Fusarium</i>       |
|       | Y2H6SS4101 | <i>Penicillium brasilianum</i> (T) (NR111499)       | 86             | JX040970              |            |                 |               |                     |                          |                |                       |
|       | Y2H6SS242  | <i>Penicillium brevicompactum</i> (T) (NR121299)    | 99             | JX040959              |            |                 |               |                     |                          |                |                       |
|       | Y2H6SS151  | <i>Penicillium citrinum</i> (T) (NR121224)          | 100            | JX040950              |            |                 |               |                     |                          |                |                       |
|       | Y2H6SS112  | <i>Penicillium daejeonium</i> (T) (NR158791)        | 99             | JX040943              |            |                 |               |                     |                          |                |                       |
|       | Y2H6SS131  | <i>Penicillium grancanariae</i> (T) (NR138348)      | 99             | JX040946              |            |                 |               |                     |                          |                |                       |
|       | Y2H6SS132  | <i>Penicillium grancanariae</i> (T) (NR138348)      | 100            | JX040947              |            |                 |               |                     |                          |                |                       |
