# Supplementary material
Source: MDPI journal article supplement (https://www.mdpi.com/2077-1312/9/4/430)
Supplement: s1 [file s1]

Table S1. Fungal endophyte isolates from host *Phragmites australis* species clusters

| Sites | Isolates    | Closest relative based on homology                 | Similarity (%) | Genbank accession no. | Division   | Class           | Order             | Family             | Genus                   |                    |                     |                   |                   |
|-------|-------------|----------------------------------------------------|----------------|-----------------------|------------|-----------------|-------------------|--------------------|-------------------------|--------------------|---------------------|-------------------|-------------------|
| 1     | Y2H1SPA484  | <i>Sarocladium oryzae</i> (T) (NR145045)           | 99             | JX040665              | Ascomycota | Ascomycetes     | Incertae sedis    | Incertae sedis     | <i>Sarocladium</i>      |                    |                     |                   |                   |
|       | Y2H1SPA442  | <i>Ramichloridium eucleae</i> (T) (NR156590)       | 99             | JX040663              |            |                 | Mycosphaerellales | Dissoconiaceae     | <i>Ramichloridium</i>   |                    |                     |                   |                   |
|       | Y2H1SPA255  | <i>Cladosporium crousii</i> (T) (NR148192)         | 99             | JX040655              |            | Dothideomycetes | Capnodiales       | Davidiellaceae     | <i>Cladosporium</i>     |                    |                     |                   |                   |
|       | Y2H1SPA371  | <i>Cladosporium pini-ponderosae</i> (T) (NR119730) | 98             | JX040658              |            |                 |                   |                    |                         |                    |                     |                   |                   |
|       | Y2H1SPA254  | <i>Paraconiothyrium estuarinum</i> (T) (NR166007)  | 99             | JX040654              |            |                 | Pleosporales      | Didymosphaeriaceae | <i>Paraconiothyrium</i> |                    |                     |                   |                   |
|       | Y2H1SPA492  | <i>Paraconiothyrium estuarinum</i> (T) (NR166007)  | 99             | JX040667              |            |                 |                   |                    |                         |                    |                     |                   |                   |
|       | Y2H1SPA242  | <i>Septoriella hollandica</i> (T) (NR164461)       | 96             | JX040652              |            |                 |                   |                    |                         | Phaeosphaeriaceae  | <i>Septoriella</i>  |                   |                   |
|       | Y2H1SPA493  | <i>Alternaria alstroemeriae</i> (T) (NR163686)     | 99             | JX040668              |            |                 |                   |                    |                         |                    |                     | Pleosporaceae     | <i>Alternaria</i> |
|       | Y2H1SPA372  | <i>Westerdykella dispersa</i> (T) (NR111187)       | 99             | JX040659              |            |                 |                   |                    |                         |                    |                     |                   |                   |
|       | Y2H1SPA343  | <i>Epicoccum thailandicum</i> (T) (NR152926)       | 99             | JX040657              |            |                 |                   |                    |                         |                    |                     | Didymellaceae     | <i>Epicoccum</i>  |
|       | Y2H1SPA175  | <i>Aspergillus oryzae</i> (T) (NR135395)           | 98             | JX040649              |            | Eurotiomycetes  | Eurotiales        | Trichocomaceae     | <i>Aspergillus</i>      |                    |                     |                   |                   |
|       | Y2H1SPA491  | <i>Aspergillus oryzae</i> (T) (NR135395)           | 99             | JX040666              |            |                 |                   |                    | <i>Talaromyces</i>      |                    |                     |                   |                   |
|       | Y2H1SPA111  | <i>Talaromyces barcinensis</i> (T) (NR137078)      | 100            | JX040644              |            | Sordariomycetes | Hypocreales       | Nectriaceae        | <i>Clavicipitaceae</i>  | <i>Claviceps</i>   |                     |                   |                   |
|       | Y2H1SPA3101 | <i>Claviceps monticola</i> (T) (NR164573)          | 100            | JX040660              |            |                 |                   |                    | <i>Fusarium</i>         |                    |                     |                   |                   |
|       | Y2H1SPA342  | <i>Fusarium arcuatisporum</i> (T) (NR164593)       | 99             | JX040656              |            |                 |                   |                    | <i>Mariannaea</i>       |                    |                     |                   |                   |
|       | Y2H1SPA174  | <i>Fusarium boothii</i> (T) (NR121203)             | 98             | JX040648              |            |                 |                   |                    |                         | <i>Penicillium</i> |                     |                   |                   |
|       | Y2H1SPA241  | <i>Mariannaea pinicola</i> (T) (NR148077)          | 98             | JX040651              |            |                 |                   |                    |                         |                    |                     |                   |                   |
|       | Y2H1SPA132  | <i>Penicillium citrinum</i> (T) (NR121224)         | 100            | JX040645              |            |                 |                   |                    |                         |                    |                     |                   |                   |
|       | Y2H1SPA441  | <i>Pseudonectria foliicola</i> (T) (NR164229)      | 99             | JX040662              |            |                 |                   |                    | <i>Pseudonectria</i>    |                    |                     |                   |                   |
|       | Y2H1SPA482  | <i>Pseudonectria foliicola</i> (T) (NR164229)      | 100            | JX040664              |            |                 |                   |                    |                         |                    |                     |                   |                   |
|       | Y2H1SPA253  | <i>Arthrospis truncata</i> (T) (NR159641)          | 100            | JX040653              |            |                 |                   |                    |                         |                    |                     |                   |                   |
|       | Y2H1SPA144  | <i>Microdochium lycopodium</i> (T) (NR145223)      | 98             | JX040646              |            |                 |                   |                    | Xylariales              | incertae sedis     | incertae sedis      | <i>Arthrospis</i> |                   |
|       | Y2H1SPA3103 | <i>Phialemoniopsis curvata</i> (T) (NR132076)      | 97             | JX040661              |            |                 |                   |                    |                         | Hyponectriaceae    | <i>Microdochium</i> |                   |                   |
|       | Y2H1SPA182  | <i>Phialemoniopsis curvata</i> (T) (NR132076)      | 100            | JX040650              |            |                 |                   |                    |                         |                    |                     |                   |                   |
|       | Y2H1SPA152  | <i>Phialemoniopsis curvata</i> (T) (NR132076)      | 98             | JX040647              |            |                 |                   |                    |                         |                    |                     |                   |                   |

Table S1. Fungal endophyte isolates from host *Phragmites australis* species clusters (continued)

| Sites | Isolates    | Closest relative based on homology                 | Similarity (%) | Genbank accession no. | Division   | Class           | Order             | Family         | Genus                 |
|-------|-------------|----------------------------------------------------|----------------|-----------------------|------------|-----------------|-------------------|----------------|-----------------------|
| 2     | Y2H2SPA272  | <i>Ramichloridium eucleae</i> (T) (NR156590)       | 99             | JX040683              | Ascomycota | Ascomycetes     | Mycosphaerellales | Dissoconiaceae | <i>Ramichloridium</i> |
|       | Y2H2SPA151  | <i>Cladosporium colombiae</i> (T) (NR119729)       | 99             | JX040671              |            | Dothideomycetes | Capnodiales       | Davidiellaceae | <i>Cladosporium</i>   |
|       | Y2H2SPA271  | <i>Cladosporium crousii</i> (T) (NR148192)         | 99             | JX040682              |            |                 |                   |                |                       |
|       | Y2H2SPA231  | <i>Cladosporium pini-ponderosae</i> (T) (NR119730) | 98             | JX040676              |            |                 |                   |                |                       |
|       | Y2H2SPA273  | <i>Paraconiothyrium estuarinum</i> (T) (NR166007)  | 100            | JX040684              |            |                 |                   |                |                       |
|       | Y2H2SPA241  | <i>Paraconiothyrium estuarinum</i> (T) (NR166007)  | 99             | JX040678              |            |                 |                   |                |                       |
|       | Y2H2SPA251  | <i>Paraconiothyrium estuarinum</i> (T) (NR166007)  | 99             | JX040679              |            |                 |                   |                |                       |
|       | Y2H2SPA143  | <i>Xenocamarosporium acaciae</i> (T) (NR137982)    | 87             | JX040670              |            |                 |                   |                |                       |
|       | Y2H2SPA233  | <i>Xenocamarosporium acaciae</i> (T) (NR137982)    | 87             | JX040677              |            |                 |                   |                |                       |
|       | Y2H2SPA221  | <i>Lentithecium carbonneanum</i> (T) (NR158534)    | 97             | JX040675              |            |                 |                   |                |                       |
|       | Y2H2SPA253  | <i>Didymocyrtis banksiae</i> (T) (NR154037)        | 97             | JX040681              |            |                 |                   |                |                       |
|       | Y2H2SPA211  | <i>Loratospora luzulae</i> (T) (NR154121)          | 100            | JX040674              |            |                 |                   |                |                       |
|       | Y2H2SPA312  | <i>Ophiosphaerella aquatica</i> (T) (NR154352)     | 99             | JX040690              |            |                 |                   |                |                       |
|       | Y2H2SPA252  | <i>Pyrenochaetopsis microspora</i> (T) (NR160059)  | 100            | JX040680              |            |                 |                   |                |                       |
|       | Y2H2SPA121  | <i>Epicoccum thailandicum</i> (T) (NR152926)       | 100            | JX040669              |            |                 |                   |                |                       |
|       | Y2H2SPA281  | <i>Epicoccum thailandicum</i> (T) (NR152926)       | 100            | JX040685              |            |                 |                   |                |                       |
|       | Y2H2SPA2103 | <i>Aspergillus neoglaber</i> (T) (NR137483)        | 99             | JX040688              |            |                 |                   |                |                       |
|       | Y2H2SPA291  | <i>Aspergillus oryzae</i> (T) (NR135395)           | 100            | JX040687              |            |                 |                   |                |                       |
|       | Y2H2SPA2105 | <i>Talaromyces amestolkiae</i> (T) (NR120179)      | 99             | JX040689              |            |                 |                   |                |                       |
|       | Y2H2SPA371  | <i>Fusarium boothii</i> (T) (NR121203)             | 99             | JX040693              |            |                 |                   |                |                       |
|       | Y2H2SPA153  | <i>Fusarium luffae</i> (T) (NR164594)              | 100            | JX040672              |            |                 |                   |                |                       |
|       | Y2H2SPA322  | <i>Penicillium grancanariae</i> (T) (NR138348)     | 99             | JX040691              |            |                 |                   |                |                       |
|       | Y2H2SPA1103 | <i>Zopfiella marina</i> (T) (NR103599)             | 98             | JX040673              |            |                 |                   |                |                       |
|       | Y2H2SPA282  | <i>Zopfiella marina</i> (T) (NR103599)             | 99             | JX040686              |            |                 |                   |                |                       |
|       | Y2H2SPA341  | <i>Phialemoniopsis curvata</i> (T) (NR132076)      | 98             | JX040692              |            |                 |                   |                |                       |

Table S1. Fungal endophyte isolates from host *Phragmites australis* species clusters (continued)

| Sites | Isolates    | Closest relative based on homology                   | Similarity (%) | Genbank accession no. | Division      | Class           | Order             | Family             | Genus                    |
|-------|-------------|------------------------------------------------------|----------------|-----------------------|---------------|-----------------|-------------------|--------------------|--------------------------|
| 3     | Y2H3SPA424  | <i>Ramichloridium eucleae</i> (T) (NR156590)         | 99             | JX040724              | Ascomycota    | Ascomycetes     | Mycosphaerellales | Dissoconiaceae     | <i>Ramichloridium</i>    |
|       | Y2H3SPA211  | <i>Cladosporium colombiae</i> (T) (NR119729)         | 100            | JX040699              |               | Dothideomycetes | Capnodiales       | Davidiellaceae     | <i>Cladosporium</i>      |
|       | Y2H3SPA183  | <i>Cladosporium crousii</i> (T) (NR148192)           | 100            | JX040698              |               |                 |                   |                    |                          |
|       | Y2H3SPA2104 | <i>Cladosporium crousii</i> (T) (NR148192)           | 99             | JX040710              |               |                 |                   |                    |                          |
|       | Y2H3SPA384  | <i>Cladosporium pini-ponderosae</i> (T) (NR119730)   | 99             | JX040721              |               |                 |                   |                    |                          |
|       | Y2H3SPA361  | <i>Cladosporium pini-ponderosae</i> (T) (NR119730)   | 100            | JX040719              |               |                 |                   |                    |                          |
|       | Y2H3SPA251  | <i>Briansuttonomyces eucalypti</i> (T) (NR153618)    | 100            | JX040702              |               |                 |                   | Didymellaceae      | <i>Briansuttonomyces</i> |
|       | Y2H3SPA385  | <i>Paraconiothyrium estuarinum</i> (T) (NR166007)    | 100            | JX040722              |               |                 |                   | Didymosphaeriaceae | <i>Paraconiothyrium</i>  |
|       | Y2H3SPA171  | <i>Parastagonospora forlicesenica</i> (T) (NR154366) | 99             | JX040696              |               |                 |                   | Phaeosphaeriaceae  | <i>Parastagonospora</i>  |
|       | Y2H3SPA222  | <i>Alternaria alstroemeriae</i> (T) (NR163686)       | 100            | JX040700              |               |                 | Pleosporales      | Pleosporaceae      | <i>Alternaria</i>        |
|       | Y2H3SPA284  | <i>Alternaria alstroemeriae</i> (T) (NR163686)       | 99             | JX040709              |               |                 |                   |                    |                          |
|       | Y2H3SPA493  | <i>Alternaria alstroemeriae</i> (T) (NR163686)       | 100            | JX040729              |               |                 |                   |                    |                          |
|       | Y2H3SPA271  | <i>Exserohilum turcicum</i> (T) (NR163537)           | 100            | JX040703              |               |                 |                   |                    |                          |
|       | Y2H3SPA274  | <i>Leptosphaeria etheridgei</i> (T) (NR111620)       | 96             | JX040705              |               |                 |                   | Leptosphaeriaceae  | <i>Leptosphaeria</i>     |
|       | Y2H3SPA353  | <i>Epicoccum thailandicum</i> (T) (NR152926)         | 99             | JX040718              |               |                 |                   | Didymellaceae      | <i>Epicoccum</i>         |
|       | Y2H3SPA352  | <i>Epicoccum thailandicum</i> (T) (NR152926)         | 99             | JX040717              |               |                 |                   |                    |                          |
|       | Y2H3SPA323  | <i>Aspergillus costaricensis</i> (T) (NR103604)      | 99             | JX040712              |               | Eurotiomycetes  | Eurotiales        | Trichocomaceae     | <i>Aspergillus</i>       |
|       | Y2H3SPA177  | <i>Aspergillus foetidus</i> (T) (NR163668)           | 100            | JX040697              |               |                 |                   |                    |                          |
|       | Y2H3SPA273  | <i>Aspergillus foetidus</i> (T) (NR163668)           | 98             | JX040704              |               |                 |                   |                    |                          |
|       | Y2H3SPA425  | <i>Aspergillus oryzae</i> (T) (NR135395)             | 100            | JX040725              |               |                 |                   |                    |                          |
|       | Y2H3SPA164  | <i>Fusarium arcuatisporum</i> (T) (NR164593)         | 100            | JX040695              |               |                 |                   |                    |                          |
|       | Y2H3SPA362  | <i>Fusarium arcuatisporum</i> (T) (NR164593)         | 100            | JX040720              |               |                 |                   |                    |                          |
|       | Y2H3SPA485  | <i>Fusarium boothii</i> NRRL (T) (NR121203)          | 100            | JX040727              |               |                 |                   |                    | <i>Fusarium</i>          |
|       | Y2H3SPA351  | <i>Fusarium boothii</i> (T) (NR121203)               | 99             | JX040716              |               |                 |                   |                    |                          |
|       | Y2H3SPA491  | <i>Fusarium luffae</i> (T) (NR164594)                | 99             | JX040728              |               |                 |                   |                    |                          |
|       | Y2H3SPA282  | <i>Penicillium citrinum</i> (T) (NR121224)           | 99             | JX040707              |               | Sordariomycetes | Hypocreales       | Nectriaceae        | <i>Penicillium</i>       |
|       | Y2H3SPA283  | <i>Penicillium citrinum</i> (T) (NR121224)           | 100            | JX040708              |               |                 |                   |                    |                          |
|       | Y2H3SPA321  | <i>Penicillium citrinum</i> (T) (NR121224)           | 100            | JX040711              |               |                 |                   |                    |                          |
|       | Y2H3SPA281  | <i>Penicillium citrinum</i> (T) (NR121224)           | 100            | JX040706              |               |                 |                   |                    |                          |
|       | Y2H3SPA483  | <i>Penicillium daejeonium</i> (T) (NR158791)         | 100            | JX040726              |               |                 |                   |                    |                          |
|       | Y2H3SPA161  | <i>Penicillium grancanariae</i> (T) (NR138348)       | 100            | JX040694              |               |                 |                   |                    |                          |
|       | Y2H3SPA331  | <i>Penicillium malacaense</i> (T) (NR121344)         | 99             | JX040714              |               |                 |                   |                    |                          |
|       | Y2H3SPA324  | <i>Pseudonectria foliicola</i> (T) (NR164229)        | 100            | JX040713              |               |                 |                   |                    | <i>Pseudonectria</i>     |
|       | Y2H3SPA231  | <i>Arthrinium malaysianum</i> (T) (NR120273)         | 100            | JX040701              |               |                 | Xylariales        | Apiosporaceae      |                          |
|       | Y2H3SPA4103 | <i>Phanerochaete conrescens</i> (T) (NR155027)       | 100            | JX040730              | Basidiomycota | Agaricomycetes  | Polyporales       | Phanerochaetaceae  | <i>Phanerochaete</i>     |
|       | Y2H3SPA3103 | <i>Mucor hiemalis f. hiemalis</i> (T) (NR152948)     | 97             | JX040723              | Zygomycota    | Mucoromycetes   | Mucorales         | Mucoraceae         | <i>Mucor</i>             |

Table S1. Fungal endophyte isolates from host *Phragmites australis* species clusters (continued)

| Sites | Isolates   | Closest relative based on homology                 | Similarity (%) | Genbank accession no. | Division   | Class           | Order       | Family         | Genus                  |
|-------|------------|----------------------------------------------------|----------------|-----------------------|------------|-----------------|-------------|----------------|------------------------|
| 4     | Y2H4SPA191 | <i>Cladosporium crousii</i> (T) (NR148192)         | 100            | JX040731              | Ascomycota | Dothideomycetes | Capnodiales | Davidiellaceae | <i>Cladosporium</i>    |
|       | Y2H4SPA251 | <i>Cladosporium pini-ponderosae</i> (T) (NR119730) | 99             | JX040733              |            |                 |             |                |                        |
|       | Y2H4SPA322 | <i>Aspergillus costaricensis</i> (T) (NR103604)    | 99             | JX040737              |            | Eurotiomycetes  | Eurotiales  | Trichocomaceae | <i>Aspergillus</i>     |
|       | Y2H4SPA254 | <i>Talaromyces barcinensis</i> (T) (NR137078)      | 99             | JX040735              |            |                 |             |                | <i>Talaromyces</i>     |
|       | Y2H4SPA391 | <i>Talaromyces veerkampii</i> (T) (NR153228)       | 99             | JX040739              |            |                 |             |                |                        |
|       | Y2H4SPA253 | <i>Penicillium citrinum</i> (T) (NR121224)         | 100            | JX040734              |            | Sordariomycetes | Hypocreales | Nectriaceae    | <i>Penicillium</i>     |
|       | Y2H4SPA321 | <i>Penicillium citrinum</i> (T) (NR121224)         | 99             | JX040736              |            |                 |             |                |                        |
|       | Y2H4SPA194 | <i>Penicillium citrinum</i> (T) (NR121224)         | 100            | JX040732              |            |                 |             |                |                        |
|       | Y2H4SPA332 | <i>Phialemoniopsis curvata</i> (T) (NR132076)      | 97             | JX040738              |            |                 | Xylariales  | incertae sedis | <i>Phialemoniopsis</i> |

Table S1. Fungal endophyte isolates from host *Phragmites australis* species clusters (continued)

| Sites | Isolates    | Closest relative based on homology                 | Similarity (%) | Genbank accession no. | Division   | Class           | Order          | Family             | Genus                    |
|-------|-------------|----------------------------------------------------|----------------|-----------------------|------------|-----------------|----------------|--------------------|--------------------------|
| 5     | Y2H5SPA311  | <i>Cladosporium colombiae</i> (T) (NR119729)       | 100            | JX040750              | Ascomycota | Dothideomycetes | Capnodiales    | Davidiellaceae     | <i>Cladosporium</i>      |
|       | Y2H5SPA431  | <i>Cladosporium crousii</i> (T) (NR148192)         | 100            | JX040755              |            |                 |                |                    |                          |
|       | Y2H5SPA412  | <i>Cladosporium pini-ponderosae</i> (T) (NR119730) | 100            | JX040754              |            |                 |                |                    |                          |
|       | Y2H5SPA341  | <i>Cladosporium pini-ponderosae</i> (T) (NR119730) | 99             | JX040752              |            |                 |                |                    |                          |
|       | Y2H5SPA145  | <i>Stagonosporopsis lupini</i> (T) (NR160205)      | 100            | JX040746              |            |                 | Pleosporales   | Didymellaceae      | <i>Stagonosporopsis</i>  |
|       | Y2H5SPA112  | <i>Paraconiothyrium estuarinum</i> (T) (NR166007)  | 100            | JX040741              |            |                 |                | Didymosphaeriaceae | <i>Paraconiothyrium</i>  |
|       | Y2H5SPA491  | <i>Xenocamarosporium acaciae</i> (T) (NR137982)    | 86             | JX040759              |            |                 |                | Sporormiaceae      | <i>Xenocamarosporium</i> |
|       | Y2H5SPA482  | <i>Westerdykella dispersa</i> (T) (NR111187)       | 99             | JX040758              |            |                 |                |                    | <i>Westerdykella</i>     |
|       | Y2H5SPA142  | <i>Aspergillus clavatus</i> (T) (NR121482)         | 100            | JX040745              |            |                 | Eurotiomycetes | Trichocomaceae     | <i>Aspergillus</i>       |
|       | Y2H5SPA4102 | <i>Aspergillus costaricensis</i> (T) (NR103604)    | 99             | JX040761              |            |                 |                |                    |                          |
|       | Y2H5SPA151  | <i>Aspergillus tubingensis</i> (T) (NR131293)      | 99             | JX040747              |            |                 |                |                    |                          |
|       | Y2H5SPA193  | <i>Aspergillus tubingensis</i> (T) (NR131293)      | 100            | JX040748              |            |                 |                |                    |                          |
|       | Y2H5SPA113  | <i>Talaromyces barcinensis</i> (T) (NR137078)      | 100            | JX040742              |            |                 |                |                    | <i>Talaromyces</i>       |
|       | Y2H5SPA141  | <i>Talaromyces veerkampii</i> (T) (NR153228)       | 99             | JX040744              |            |                 |                |                    |                          |
|       | Y2H5SPA111  | <i>Diaporthe citri</i> (T) (NR145304)              | 100            | JX040740              |            |                 | Diaporthales   | Diaporthaceae      | <i>Diaporthe</i>         |
|       | Y2H5SPA232  | <i>Fusarium acutatum</i> (T) (NR111142)            | 99             | JX040749              |            |                 |                |                    |                          |
|       | Y2H5SPA343  | <i>Fusarium boothii</i> (T) (NR121203)             | 99             | JX040753              |            | Sordariomycetes | Hypocreales    | Nectriaceae        | <i>Fusarium</i>          |
|       | Y2H5SPA461  | <i>Fusarium luffae</i> (T) (NR164594)              | 99             | JX040756              |            |                 |                |                    | <i>Penicillium</i>       |
|       | Y2H5SPA322  | <i>Penicillium citrinum</i> (T) (NR121224)         | 99             | JX040751              |            |                 |                |                    |                          |
|       | Y2H5SPA471  | <i>Penicillium jacksonii</i> (T) (NR111675)        | 99             | JX040757              |            |                 |                |                    |                          |
|       | Y2H5SPA4101 | <i>Penicillium pedernalense</i> (T) (NR146250)     | 99             | JX040760              |            |                 |                |                    | <i>Zopfiella</i>         |
|       | Y2H5SPA121  | <i>Zopfiella marina</i> (T) (NR103599)             | 96             | JX040743              |            |                 | Sordariales    | Lasiosphaeriaceae  |                          |

Table S1. Fungal endophyte isolates from host *Phragmites australis* species clusters (continued)

| Sites | Isolates    | Closest relative based on homology                 | Similarity (%) | Genbank accession no. | Division   | Class           | Order        | Family             | Genus                   |
|-------|-------------|----------------------------------------------------|----------------|-----------------------|------------|-----------------|--------------|--------------------|-------------------------|
| 6     | Y2H6SPA313  | <i>Cladosporium colombiae</i> (T) (NR119729)       | 100            | JX040764              | Ascomycota | Dothideomycetes | Capnodiales  | Davidiellaceae     | <i>Cladosporium</i>     |
|       | Y2H6SPA271  | <i>Cladosporium pini-ponderosae</i> (T) (NR119730) | 100            | JX040762              |            |                 |              |                    |                         |
|       | Y2H6SPA3101 | <i>Paraconiothyrium estuarinum</i> (T) (NR166007)  | 99             | JX040767              |            |                 | Pleosporales | Didymosphaeriaceae | <i>Paraconiothyrium</i> |
|       | Y2H6SPA341  | <i>Paraconiothyrium estuarinum</i> (T) (NR166007)  | 99             | JX040765              |            |                 |              |                    |                         |
|       | Y2H6SPA272  | <i>Westerdykella dispersa</i> (T) (NR111187)       | 99             | JX040763              |            | Eurotiomycetes  | Eurotiales   | Sporormiaceae      | <i>Westerdykella</i>    |
|       | Y2H6SPA343  | <i>Talaromyces veerkampii</i> (T) (NR153228)       | 99             | JX040766              |            |                 |              | Trichocomaceae     | <i>Talaromyces</i>      |

Table S1. Fungal endophyte isolates from host *Phragmites australis* species clusters (continued)

| Sites | Isolates   | Closest relative based on homology            | Similarity (%) | Genbank accession no. | Division   | Class           | Order        | Family            | Genus                |
|-------|------------|-----------------------------------------------|----------------|-----------------------|------------|-----------------|--------------|-------------------|----------------------|
| 7     | Y2H7SPA173 | <i>Cladosporium colombiae</i> (T) (NR119729)  | 100            | JX040771              | Ascomycota | Dothideomycetes | Capnodiales  | Davidiellaceae    | <i>Cladosporium</i>  |
|       | Y2H7SPA241 | <i>Cladosporium crousii</i> (T) (NR148192)    | 100            | JX040775              |            |                 |              |                   |                      |
|       | Y2H7SPA243 | <i>Phaeosphaeria podocarpi</i> (T) (NR137933) | 100            | JX040776              |            |                 | Pleosporales | Phaeosphaeriaceae | <i>Phaeosphaeria</i> |
|       | Y2H7SPA212 | <i>Alternaria destruens</i> (T) (NR137143)    | 100            | JX040772              |            |                 |              | Pleosporaceae     | <i>Alternaria</i>    |
|       | Y2H7SPA234 | <i>Talaromyces barcinensis</i> (T) (NR137078) | 99             | JX040774              |            | Eurotiomycetes  | Eurotiales   | Trichocomaceae    | <i>Talaromyces</i>   |
|       | Y2H7SPA131 | <i>Fusarium fujikuroi</i> (T) (NR111889)      | 100            | JX040768              |            | Sordariomycetes | Hypocreales  | Nectriaceae       | <i>Fusarium</i>      |
|       | Y2H7SPA231 | <i>Fusarium hainanense</i> (T) (NR164597)     | 100            | JX040773              |            |                 |              |                   |                      |
|       | Y2H7SPA172 | <i>Fusarium hainanense</i> (T) (NR164597)     | 99             | JX040770              |            |                 |              |                   |                      |
|       | Y2H7SPA152 | <i>Phialemoniopsis curvata</i> (T) (NR132076) | 97             | JX040769              |            |                 |              |                   |                      |

Table S1. Fungal endophyte isolates from host *Phragmites australis* species clusters (continued)

| Sites | Isolates    | Closest relative based on homology            | Similarity (%) | Genbank accession no. | Division   | Class           | Order        | Family            | Genus                  |
|-------|-------------|-----------------------------------------------|----------------|-----------------------|------------|-----------------|--------------|-------------------|------------------------|
| 8     | Y2H8SPA113  | <i>Leptoxyphium glochidion</i> (T) (NR155316) | 99             | JX040779              | Ascomycota | Dothideomycetes | Capnodiales  | Capnodiaceae      | <i>Leptoxyphium</i>    |
|       | Y2H8SPA114  | <i>Cladosporium crousii</i> (T) (NR148192)    | 100            | JX040780              |            |                 |              | Davidiellaceae    | <i>Cladosporium</i>    |
|       | Y2H8SPA194  | <i>Cladosporium crousii</i> (T) (NR148192)    | 99             | JX040784              |            |                 | Pleosporales | Phaeosphaeriaceae | <i>Septoriella</i>     |
|       | Y2H8SPA213  | <i>Septoriella hollandica</i> (T) (NR164461)  | 99             | JX040786              |            |                 |              | Pleosporaceae     | <i>Exserohilum</i>     |
|       | Y2H8SPA112  | <i>Septoriella hollandica</i> (T) (NR164461)  | 99             | JX040778              |            |                 |              | Didymellaceae     | <i>Epicoccum</i>       |
|       | Y2H8SPA1102 | <i>Exserohilum turcicum</i> (T) (NR163537)    | 99             | JX040785              |            |                 |              |                   |                        |
|       | Y2H8SPA111  | <i>Epicoccum phragmospora</i> (T) (NR165920)  | 100            | JX040777              |            | Sordariomycetes | Hypocreales  | Nectriaceae       | <i>Fusarium</i>        |
|       | Y2H8SPA193  | <i>Fusarium fujikuroi</i> (T) (NR111889)      | 100            | JX040783              |            |                 |              |                   | <i>Penicillium</i>     |
|       | Y2H8SPA232  | <i>Fusarium hainanense</i> (T) (NR164597)     | 100            | JX040788              |            |                 | Xylariales   | Apiosporaceae     | <i>Arthrinium</i>      |
|       | Y2H8SPA131  | <i>Fusarium luffiae</i> (T) (NR164594)        | 100            | JX040781              |            |                 |              | incertae sedis    | <i>Phialemoniopsis</i> |
|       | Y2H8SPA251  | <i>Penicillium camponotum</i> (T) (NR158823)  | 100            | JX040789              |            |                 |              |                   |                        |
|       | Y2H8SPA231  | <i>Arthrinium malaysianum</i> (T) (NR120273)  | 100            | JX040787              |            |                 |              |                   |                        |
|       | Y2H8SPA191  | <i>Phialemoniopsis curvata</i> (T) (NR132076) | 98             | JX040782              |            |                 |              |                   |                        |



Table S1. Fungal endophyte isolates from host *Phragmites australis* species clusters (continued)

| Sites | Isolates   | Closest relative based on homology                | Similarity (%) | Genbank accession no. | Division   | Class           | Order        | Family         | Genus               |                      |                 |
|-------|------------|---------------------------------------------------|----------------|-----------------------|------------|-----------------|--------------|----------------|---------------------|----------------------|-----------------|
| 9     | Y2H9SPA113 | <i>Cladosporium crousii</i> (T) (NR148192)        | 100            | JX040790              | Ascomycota | Dothideomycetes | Capnodiales  | Davidiellaceae | <i>Cladosporium</i> |                      |                 |
|       | Y2H9SPA131 | <i>Exserohilum turcicum</i> (T) (NR163537)        | 100            | JX040791              |            |                 | Pleosporales | Pleosporaceae  | <i>Exserohilum</i>  |                      |                 |
|       | Y2H9SPA141 | <i>Talaromyces barcinensis</i> (T) (NR137078)     | 99             | JX040792              |            | Eurotiomycetes  | Eurotiales   | Trichocomaceae | <i>Talaromyces</i>  |                      |                 |
|       | Y2H9SPA241 | <i>Talaromyces barcinensis</i> (T) (NR137078)     | 100            | JX040798              |            |                 |              |                |                     |                      |                 |
|       | Y2H9SPA263 | <i>Simplicillium aogashimaense</i> (T) (NR111026) | 100            | JX040800              |            |                 |              |                | Cordycipitaceae     | <i>Simplicillium</i> |                 |
|       | Y2H9SPA181 | <i>Fusarium arcuatisporum</i> (T) (NR164593)      | 100            | JX040795              |            | Sordariomycetes |              |                | Hypocreales         | Nectriaceae          | <i>Fusarium</i> |
|       | Y2H9SPA211 | <i>Fusarium arcuatisporum</i> (T) (NR164593)      | 99             | JX040796              |            |                 |              |                |                     |                      |                 |
|       | Y2H9SPA143 | <i>Fusarium arcuatisporum</i> (T) (NR164593)      | 100            | JX040793              |            |                 |              |                |                     |                      |                 |
|       | Y2H9SPA161 | <i>Fusarium luffae</i> (T) (NR164594)             | 100            | JX040794              |            |                 |              |                |                     |                      |                 |
|       | Y2H9SPA242 | <i>Penicillium reticulisporum</i> (T) (NR121231)  | 99             | JX040799              |            |                 |              |                |                     |                      |                 |
|       | Y2H9SPA441 | <i>Penicillium rubens</i> (T) (NR111815)          | 100            | JX040801              |            |                 |              |                |                     |                      |                 |

Table S1. Fungal endophyte isolates from host *Phragmites australis* species clusters (continued)

| Sites | Isolates     | Closest relative based on homology                  | Similarity (%) | Genbank accession no. | Division        | Class           | Order           | Family             | Genus                    |
|-------|--------------|-----------------------------------------------------|----------------|-----------------------|-----------------|-----------------|-----------------|--------------------|--------------------------|
| 10    | Y2H10SPA111  | <i>Cladosporium crousii</i> (T) (NR148192)          | 100            | JX040802              | Ascomycota      | Dothideomycetes | Capnodiales     | Davidiellaceae     | <i>Cladosporium</i>      |
|       | Y2H10SPA251  | <i>Cladosporium crousii</i> (T) (NR148192)          | 100            | JX040816              |                 |                 |                 |                    |                          |
|       | Y2H10SPA131  | <i>Paraconiothyrium estuarinum</i> (T) (NR166007)   | 98             | JX040803              |                 |                 | Pleosporales    | Didymosphaeriaceae | <i>Paraconiothyrium</i>  |
|       | Y2H10SPA163  | <i>Paraphaeosphaeria verruculosa</i> T) (NR163521)  | 97             | JX040808              |                 |                 |                 |                    | <i>Paraphaeosphaeria</i> |
|       | Y2H10SPA252  | <i>Alternaria alstroemeriae</i> (T) (NR163686)      | 100            | JX040817              |                 |                 |                 | Pleosporaceae      | <i>Alternaria</i>        |
|       | Y2H10SPA142  | <i>Alternaria alstroemeriae</i> (T) (NR163686)      | 99             | JX040804              |                 |                 |                 |                    |                          |
|       | Y2H10SPA211  | <i>Alternaria alstroemeriae</i> (T) (NR163686)      | 100            | JX040814              |                 |                 |                 |                    |                          |
|       | Y2H10SPA212  | <i>Alternaria alstroemeriae</i> (T) (NR163686)      | 100            | JX040815              |                 |                 |                 |                    |                          |
|       | Y2H10SPA182  | <i>Aspergillus clavatus</i> (T) (NR121482)          | 100            | JX040810              |                 | Eurotiomycetes  | Eurotiales      | Trichocomaceae     | <i>Aspergillus</i>       |
|       | Y2H10SPA1103 | <i>Talaromyces californicus</i> (T) (NR165527)      | 99             | JX040813              |                 |                 |                 |                    | <i>Talaromyces</i>       |
|       | Y2H10SPA181  | <i>Lecanicillium coprophilum</i> (T) (NR163303)     | 100            | JX040809              | Sordariomycetes | Hypocreales     | Cordycipitaceae | Nectriaceae        | <i>Lecanicillium</i>     |
|       | Y2H10SPA162  | <i>Fusarium arcuatisporum</i> (T) (NR164593)        | 100            | JX040807              |                 |                 |                 |                    | <i>Fusarium</i>          |
|       | Y2H10SPA1101 | <i>Penicillium oxalicum</i> (T) (NR121232)          | 100            | JX040812              |                 |                 |                 |                    | <i>Penicillium</i>       |
|       | Y2H10SPA143  | <i>Phialemoniopsis curvata</i> (T) (NR132076)       | 98             | JX040805              |                 |                 | Xylariales      | incertae sedis     | <i>Phialemoniopsis</i>   |
|       | Y2H10SPA161  | <i>Phialemoniopsis curvata</i> (T) (NR132076)       | 98             | JX040806              |                 |                 |                 |                    |                          |
|       | Y2H10SPA193  | <i>Phialemoniopsis hongkongensis</i> (T) (NR149339) | 100            | JX040811              |                 |                 |                 |                    |                          |

Table S1. Fungal endophyte isolates from host *Phragmites australis* species clusters (continued)

| Sites | Isolates    | Closest relative based on homology                 | Similarity (%) | Genbank accession no. | Division   | Class                  | Order                  | Family                 | Genus                |
|-------|-------------|----------------------------------------------------|----------------|-----------------------|------------|------------------------|------------------------|------------------------|----------------------|
| 11    | Y2H11SPA213 | <i>Cladosporium colombiae</i> (T) (NR119729)       | 100            | JX040824              | Ascomycota | <i>Dothideomycetes</i> | Capnodiales            | Davidiellaceae         | <i>Cladosporium</i>  |
|       | Y2H11SPA121 | <i>Cladosporium crousii</i> (T) (NR148192)         | 100            | JX040819              |            |                        |                        |                        |                      |
|       | Y2H11SPA191 | <i>Cladosporium pini-ponderosae</i> (T) (NR119730) | 100            | JX040823              |            |                        |                        |                        |                      |
|       | Y2H11SPA231 | <i>Epicoccum thailandicum</i> (T) (NR152926)       | 99             | JX040826              |            | <i>Leotiomycetes</i>   | Thelebolales           | <i>Pseudeurotium</i>   | <i>Epicoccum</i>     |
|       | Y2H11SPA161 | <i>Pseudeurotium bakeri</i> (T) (NR145345)         | 98             | JX040821              |            |                        |                        |                        | <i>Pseudeurotium</i> |
|       | Y2H11SPA221 | <i>Fusarium arcuatisporum</i> (T) (NR164593)       | 100            | JX040825              |            |                        |                        | <i>Sordariomycetes</i> | Hypocreales          |
|       | Y2H11SPA111 | <i>Penicillium oxalicum</i> (T) (NR121232)         | 100            | JX040818              |            | <i>Penicillium</i>     |                        |                        |                      |
|       | Y2H11SPA181 | <i>Parasarocladium gamsii</i> (T) (NR159615)       | 100            | JX040822              |            | <i>Sarocladiaceae</i>  | <i>Parasarocladium</i> |                        |                      |
