# Supplementary material
Source: MDPI journal article supplement (https://www.mdpi.com/2077-1312/9/4/430)
Supplement: s1 [file s1]

**Table S3.** Distribution of the endophytic genera from each site of halophyte species

| Fungal genera<br>sampling site character | <i>Phragmites australis</i> |   |   |   |   |   |                              |   |   |    |    | <i>Suaeda japonica</i>       |    |    |    |    |    |
|------------------------------------------|-----------------------------|---|---|---|---|---|------------------------------|---|---|----|----|------------------------------|----|----|----|----|----|
|                                          | salt marsh in the delta     |   |   |   |   |   | salt marsh in the tidal flat |   |   |    |    | salt marsh in the tidal flat |    |    |    |    |    |
| site number                              | 1                           | 2 | 3 | 4 | 5 | 6 | 7                            | 8 | 9 | 10 | 11 | 12                           | 13 | 14 | 15 | 16 | 17 |
| <i>Alternaria</i>                        | 1                           |   | 3 | 1 |   |   | 1                            | 1 | 1 | 4  |    | 1                            | 1  | 1  | 2  | 4  | 6  |
| <i>Arthrinium</i>                        |                             |   | 1 |   |   |   |                              |   |   |    |    |                              |    | 3  |    |    |    |
| <i>Arthrospis</i>                        | 1                           |   |   |   |   |   |                              |   |   |    |    |                              |    |    |    |    |    |
| <i>Aspergillus</i>                       | 2                           | 2 | 4 |   | 4 |   |                              |   |   | 1  |    | 3                            | 3  |    | 4  | 1  | 3  |
| <i>Aureobasidium</i>                     |                             |   | 1 |   |   |   |                              |   |   |    |    |                              | 1  | 1  | 1  | 1  | 1  |
| <i>Briassutonomycetes</i>                |                             |   |   |   |   |   |                              |   |   |    |    |                              |    | 1  |    |    |    |
| <i>Cercospora</i>                        |                             |   |   |   |   |   |                              |   |   |    |    |                              |    | 1  |    |    |    |
| <i>Ceriporia</i>                         |                             |   |   |   |   |   |                              |   |   |    |    |                              |    |    |    | 1  |    |
| <i>Cladosporium</i>                      | 2                           | 3 | 5 | 2 | 4 | 2 | 2                            | 2 |   | 2  | 3  |                              | 1  | 5  | 4  | 3  | 3  |
| <i>Claviceps</i>                         | 1                           |   |   |   |   |   |                              |   |   |    |    |                              |    |    |    |    |    |
| <i>Colletotrichum</i>                    |                             |   |   |   |   |   |                              |   |   |    |    |                              | 6  | 1  |    | 1  | 3  |
| <i>Curvularia</i>                        |                             |   |   |   |   |   |                              |   |   |    |    |                              |    |    |    |    | 1  |
| <i>Diaporthe</i>                         |                             |   |   |   | 1 |   |                              |   |   |    |    | 1                            | 1  |    | 2  |    |    |
| <i>Didymocyrtis</i>                      |                             | 1 |   |   |   |   |                              |   |   |    |    |                              |    |    |    |    |    |
| <i>Dimorphosporicola</i>                 |                             |   |   |   |   |   |                              |   |   |    |    | 1                            |    | 1  | 2  | 2  | 1  |
| <i>Epicoccum</i>                         | 1                           | 2 | 2 |   |   |   |                              | 1 |   |    | 1  |                              |    |    |    | 1  |    |
| <i>Eutypella</i>                         |                             |   |   |   |   |   |                              |   |   |    |    | 1                            |    |    |    |    |    |
| <i>Exserohilum</i>                       |                             |   | 1 |   |   |   |                              | 1 | 1 |    |    |                              |    |    |    |    |    |
| <i>Flavodon</i>                          |                             |   |   |   |   |   |                              |   |   |    |    |                              |    |    |    | 1  |    |
| <i>Fusarium</i>                          | 2                           | 2 | 5 |   | 3 |   | 3                            | 3 | 4 | 1  | 1  |                              |    | 6  | 4  | 2  | 1  |
| <i>Lecanicillium</i>                     |                             |   |   |   |   |   |                              |   |   | 1  |    |                              |    |    |    |    |    |
| <i>Lentithecium</i>                      |                             | 1 |   |   |   |   |                              |   |   |    |    |                              |    | 1  |    |    |    |
| <i>Leptosphaeria</i>                     |                             |   | 1 |   |   |   |                              |   |   |    |    |                              |    |    |    |    |    |
| <i>Leptoxypodium</i>                     |                             |   |   |   |   |   |                              | 1 |   |    |    |                              |    |    |    |    |    |
| <i>Loratospora</i>                       |                             | 1 |   |   |   |   |                              |   |   |    |    |                              | 1  |    |    |    |    |
| <i>Mariannaea</i>                        | 1                           |   |   |   |   |   |                              |   |   |    |    |                              |    |    |    |    |    |
| <i>Microdochium</i>                      | 1                           |   |   |   |   |   |                              |   |   |    |    |                              |    |    |    |    |    |
| <i>Mucor</i>                             |                             |   | 1 |   |   |   |                              |   |   |    |    |                              |    |    |    |    |    |
| <i>Ophiosphaerella</i>                   |                             | 1 |   |   |   |   |                              |   |   |    |    |                              |    |    |    |    |    |
| <i>Paracamarosporium</i>                 |                             |   |   |   |   |   |                              |   |   |    |    |                              |    | 2  |    |    |    |
| <i>Paraconiothyrium</i>                  | 2                           | 3 | 1 |   | 1 | 2 |                              |   |   | 1  |    |                              |    | 3  |    | 1  |    |
| <i>Paraphaeosphaeria</i>                 |                             |   |   |   |   |   |                              |   |   | 1  |    |                              |    |    |    |    |    |
| <i>Parasarcocladium</i>                  |                             |   |   |   |   |   |                              |   |   |    | 1  |                              |    |    |    |    |    |
| <i>Parastagonospora</i>                  |                             |   | 1 |   |   |   |                              |   |   |    |    |                              |    |    |    |    |    |
| <i>Penicillium</i>                       | 1                           | 1 | 7 | 3 | 3 |   |                              | 1 | 2 | 1  | 1  | 4                            | 1  | 3  | 5  | 1  | 6  |
| <i>Peroneutypa</i>                       |                             |   |   |   |   |   |                              |   |   |    |    |                              |    |    | 1  |    |    |

[illegible]
